# Supplementary material for: Design, synthesis, and structure–activity relationship studies of 6,7-dihydro-5H-pyrrolo[1,2-b][1,2,4]triazole derivatives as necroptosis inhibitors
Source: Royal Society of Chemistry journal article supplement (doi:10.1039/d4md00265b), 2024-01-01

## Supporting Information

### Design, synthesis, and structure-activity relationship studies of 6,7-dihydro-5H-pyrrolo[1,2-*b*][1,2,4]triazole derivatives as necroptosis inhibitors

Zeichen Jin<sup>a c #</sup>, Yang Dai<sup>b c #</sup>, Yinchun Ji<sup>b</sup>, Xia Peng<sup>b</sup>, Wenhui Duan<sup>a c d</sup>, Jing Ai<sup>b c \*</sup>  
and Hefeng Zhang<sup>a \*</sup>

<sup>a</sup> Small-Molecule Drug Research Center, Shanghai Institute of Materia Medica (SIMM), Chinese Academy of Sciences, 555 Zu Chong Zhi Road, Shanghai, 201203, China

<sup>b</sup> Cancer Research Center, Shanghai Institute of Materia Medica (SIMM), Chinese Academy of Sciences, 555 Zu Chong Zhi Road, Shanghai, 201203, China

<sup>c</sup> School of Pharmacy, University of Chinese Academy of Sciences, No. 19A Yuquan Road, Beijing, 100049, China

<sup>d</sup> Shandong Laboratory of Yantai Drug Discovery, Bohai Rim Advanced Research Institute for Drug Discovery. Yantai, Shandong, 264117, China

\* Corresponding authors: zhanghefeng1@simm.ac.cn (H. Zhang), jai@simm.ac.cn (J. Ai).

# Equal contributions: these authors contributed equally to this work.

### *Table of contents*

|                                          |     |
|------------------------------------------|-----|
| 1. Preparation of key intermediates..... | S2  |
| 2. NMR spectra of target compounds.....  | S6  |
| 3. HPLC traces of target compounds ..... | S28 |
| 4. HRMS of compound <b>26</b> .....      | S43 |

## 1. Preparation of key intermediates

Intermediates **S5b–S5g** and **S9a–S9e** were synthesized *via* similar routes to intermediates **S5a**.

### **5-(3-(2-Amino-5-fluoropyridin-4-yl)-4-methylphenoxy)-2-methylpentan-2-ol (S5b)**

Purified by preparative thin layer chromatography (dichloromethane: methanol = 20: 1, V: V) as a brown oil. Yield 75%. <sup>1</sup>H NMR (400 MHz, methanol-*d*<sub>4</sub>) δ 7.85 (d, *J* = 3.8 Hz, 1H), 7.20 (d, *J* = 8.5 Hz, 1H), 6.91 (dd, *J* = 8.5, 2.7 Hz, 1H), 6.75 (d, *J* = 2.7 Hz, 1H), 6.48 (d, *J* = 3.8 Hz, 1H), 3.99 (t, *J* = 6.4 Hz, 2H), 2.14 (s, 3H), 1.90 – 1.83 (m, 2H), 1.67 – 1.62 (m, 2H), 1.24 (s, 6H). LC/MS (ESI) *m/z*: 319.2 [M + H]<sup>+</sup>.

### **5-(3-(2-Amino-5-chloropyridin-4-yl)-4-methylphenoxy)-2-methylpentan-2-ol (S5c)**

Purified by preparative thin layer chromatography (dichloromethane: methanol = 20: 1, V: V) as a pale-yellow oil. Yield 75%. <sup>1</sup>H NMR (400 MHz, DMSO-*d*<sub>6</sub>) δ 7.96 (s, 1H), 7.17 (d, *J* = 8.5 Hz, 1H), 6.86 (dd, *J* = 8.5, 2.8 Hz, 1H), 6.61 (d, *J* = 2.8 Hz, 1H), 6.29 (s, 1H), 6.18 (s, 2H), 4.16 (s, 1H), 3.91 (t, *J* = 6.6 Hz, 2H), 1.98 (s, 3H), 1.76 – 1.67 (m, 2H), 1.48 – 1.41 (m, 2H), 1.07 (s, 6H). LC/MS (ESI) *m/z*: 335.2 [M + H]<sup>+</sup>.

### **5-(3-(2-Amino-5-methylpyridin-4-yl)-4-methylphenoxy)-2-methylpentan-2-ol (S5d)**

Purified by preparative thin layer chromatography (dichloromethane: methanol = 20: 1, V: V) as a pale-yellow oil. Yield 89%. <sup>1</sup>H NMR (400 MHz, DMSO-*d*<sub>6</sub>) δ 7.79 (s, 1H), 7.16 (d, *J* = 8.4 Hz, 1H), 6.82 (dd, *J* = 8.4, 2.7 Hz, 1H), 6.54 (d, *J* = 2.7 Hz, 1H), 6.15 (s, 1H), 5.69 (s, 2H), 4.16 (s, 1H), 3.90 (t, *J* = 6.6 Hz, 2H), 1.91 (s, 3H), 1.89 (s, 2H), 1.76 (s, 3H), 1.74 – 1.67 (m, 2H), 1.47 – 1.42 (m, 2H), 1.07 (s, 6H). LC/MS (ESI) *m/z*: 315.3 [M + H]<sup>+</sup>.

### **5-(3-(6-Aminopyridazin-4-yl)-4-methylphenoxy)-2-methylpentan-2-ol (S5e)**

Purified by preparative thin layer chromatography (dichloromethane: methanol = 20: 1, V: V) as a gray solid. Yield 50%. <sup>1</sup>H NMR (400 MHz, DMSO-*d*<sub>6</sub>) δ 8.55 (d, *J* = 2.7 Hz, 1H), 7.23 (d, *J* = 8.4 Hz, 1H), 6.96 (dd, *J* = 8.4, 2.7 Hz, 1H), 6.94 (d, *J* = 2.7 Hz, 1H), 6.90 (d, *J* = 2.7 Hz, 1H), 6.73 (s, 2H), 4.19 (s, 1H), 3.97 (t, *J* = 6.6 Hz, 2H),

2.19 (s, 3H), 1.81 – 1.72 (m, 2H), 1.53 – 1.46 (m, 2H), 1.11 (s, 6H). LC/MS (ESI)  $m/z$ : 302.2 [M + H]<sup>+</sup>.

***5-(3-(2-Aminopyridin-4-yl)-4-chlorophenoxy)-2-methylpentan-2-ol (S5f)***

Purified by preparative thin layer chromatography (dichloromethane: methanol = 20: 1, V: V) as a black solid. Yield 83%. <sup>1</sup>H NMR (400 MHz, DMSO-*d*<sub>6</sub>) δ 7.95 (d,  $J$  = 5.3 Hz, 1H), 7.43 (d,  $J$  = 8.8 Hz, 1H), 6.98 (dd,  $J$  = 8.8, 3.0 Hz, 1H), 6.87 (d,  $J$  = 3.0 Hz, 1H), 6.51 (d,  $J$  = 1.5 Hz, 1H), 6.45 (s, 1H), 6.03 (s, 2H), 4.19 (s, 1H), 3.98 (t,  $J$  = 6.6 Hz, 2H), 1.79 – 1.69 (m, 2H), 1.50 – 1.42 (m, 2H), 1.09 (s, 6H). LC/MS (ESI)  $m/z$ : 321.2 [M + H]<sup>+</sup>.

***5-(3-(2-Aminopyridin-4-yl)phenoxy)-2-methylpentan-2-ol (S5g)***

Purified by preparative thin layer chromatography (dichloromethane: methanol = 20: 1, V: V) as a black solid. Yield 83%. <sup>1</sup>H NMR (400 MHz, chloroform-*d*) δ 8.07 (s, 1H), 7.35 (d,  $J$  = 8.2 Hz, 1H), 7.15 (d,  $J$  = 5.6 Hz, 1H), 7.10 (s, 1H), 6.94 (d,  $J$  = 8.2 Hz, 1H), 6.87 (d,  $J$  = 5.6 Hz, 1H), 6.72 (s, 1H), 4.78 (s, 2H), 4.04 (t,  $J$  = 6.3 Hz, 2H), 1.96 – 1.86 (m, 2H), 1.72 – 1.64 (m, 2H), 1.27 (s, 6H). LC/MS (ESI)  $m/z$ : 287.2 [M + H]<sup>+</sup>.

***4-(5-Methoxy-2-methylphenyl)pyridin-2-amine (S9a)***

The title compound was purified by preparative thin layer chromatography (dichloromethane: methanol = 20: 1, V: V) as a black solid and directly used in the next step. Yield 73%. LC/MS (ESI)  $m/z$ : 215.1 [M + H]<sup>+</sup>.

***1-(3-(2-Aminopyridin-4-yl)-4-methylphenoxy)-2-methylpropan-2-ol (S9b)***

Purified by preparative thin layer chromatography (dichloromethane: methanol = 20: 1, V: V) as a black solid. Yield 52%. <sup>1</sup>H NMR (400 MHz, chloroform-*d*) δ 8.05 (d,  $J$  = 5.2 Hz, 1H), 7.16 (d,  $J$  = 8.4 Hz, 1H), 6.86 (dd,  $J$  = 8.4, 2.3 Hz, 1H), 6.76 (d,  $J$  = 2.3 Hz, 1H), 6.62 (d,  $J$  = 5.2 Hz, 1H), 6.47 (s, 1H), 4.81 (s, 2H), 3.79 (s, 2H), 2.19 (s, 3H), 1.34 (s, 6H). LC/MS (ESI)  $m/z$ : 272.2 [M + H]<sup>+</sup>.

***4-(2-Methyl-5-(2-(tetrahydro-2H-pyran-4-yl)ethoxy)phenyl)pyridin-2-amine (S9c)***

Purified by preparative thin layer chromatography (dichloromethane: methanol = 20: 1, V: V) as a gray solid. Yield 55%. <sup>1</sup>H NMR (400 MHz, chloroform-*d*) δ 8.08 (d,  $J$  = 5.2 Hz, 1H), 7.15 (d,  $J$  = 8.4 Hz, 1H), 6.82 (dd,  $J$  = 8.4, 2.7 Hz, 1H), 6.73 (d,  $J$  = 2.7

Hz, 1H), 6.62 (dd,  $J = 5.3, 1.5$  Hz, 1H), 6.44 (s, 1H), 4.50 (s, 2H), 4.04 – 3.92 (m, 4H), 3.46 – 3.34 (m, 2H), 2.19 (s, 3H), 1.77 – 1.69 (m, 3H), 1.69 – 1.62 (m, 2H), 1.41 – 1.29 (m, 2H). LC/MS (ESI)  $m/z$ : 313.2  $[M + H]^+$ .

***4-(3-(2-Aminopyridin-4-yl)-4-methylphenoxy)butanenitrile (S9d)***

The title compound was purified by preparative thin layer chromatography (dichloromethane: methanol = 20: 1, V: V) as a gray solid and directly used in the next step. Yield 58%. LC/MS (ESI)  $m/z$ : 268.2  $[M + H]^+$ .

***4-(2-Methyl-5-(2-morpholinoethoxy)phenyl)pyridin-2-amine (S9e)***

Purified by preparative thin layer chromatography (dichloromethane: methanol = 20: 1, V: V) as a gray solid. Yield 60%.  $^1\text{H}$  NMR (400 MHz, chloroform- $d$ )  $\delta$  8.09 (d,  $J = 5.3$  Hz, 1H), 7.16 (d,  $J = 8.4$  Hz, 1H), 6.84 (dd,  $J = 8.4, 2.8$  Hz, 1H), 6.75 (d,  $J = 2.8$  Hz, 1H), 6.62 (dd,  $J = 5.3, 1.5$  Hz, 1H), 6.44 (t,  $J = 1.5$  Hz, 1H), 4.50 (s, 2H), 4.11 (t,  $J = 5.7$  Hz, 2H), 3.76 – 3.70 (m, 4H), 2.80 (t,  $J = 5.7$  Hz, 2H), 2.62 – 2.54 (m, 4H), 2.19 (s, 3H). LC/MS (ESI)  $m/z$ : 314.2  $[M + H]^+$ .

Intermediates **S7b–S7h** and **S11a–S11b** were synthesized via similar routes to intermediates **S7a**.

***5-(2-Fluorophenyl)-6,7-dihydro-5H-pyrrolo[1,2-b][1,2,4]triazole-2-carboxylic acid (S7b)***

The title compound was obtained through filtration as a white solid and directly used in the next step. Yield 54%. LC/MS (ESI)  $m/z$ : 246.1  $[M - H]^-$ .

***5-(3-Fluorophenyl)-6,7-dihydro-5H-pyrrolo[1,2-b][1,2,4]triazole-2-carboxylic acid (S7c)***

The title compound was obtained through filtration as a white solid and directly used in the next step. Yield 54%.  $^1\text{H}$  NMR (400 MHz, DMSO- $d_6$ )  $\delta$  13.23 (brs, 1H), 7.46 (dd,  $J = 8.2, 6.0$  Hz, 1H), 7.22 – 7.18 (m, 1H), 7.18 – 7.08 (m, 2H), 5.61 (dd,  $J = 8.2, 6.0$  Hz, 1H), 3.24 – 3.05 (m, 3H), 3.04 – 2.94 (m, 1H), 2.62 – 2.54 (m, 1H). LC/MS (ESI)  $m/z$ : 246.1  $[M - H]^-$ .

***5-(4-Fluorophenyl)-6,7-dihydro-5H-pyrrolo[1,2-b][1,2,4]triazole-2-carboxylic acid (S7d)***

The title compound was obtained through filtration as a white solid and directly

used in the next step. Yield 84%. <sup>1</sup>H NMR (400 MHz, DMSO-*d*<sub>6</sub>) δ 13.20 (brs, 1H), 7.37 – 7.28 (m, 2H), 7.25 – 7.21 (m, 2H), 5.59 (t, *J* = 7.3 Hz, 1H), 3.21 – 3.04 (m, 2H), 3.04 – 2.92 (m, 1H), 2.60 – 2.52 (m, 1H). LC/MS (ESI) *m/z*: 246.1 [M - H]<sup>-</sup>.

***5-Cyclohexyl-6,7-dihydro-5H-pyrrolo[1,2-b][1,2,4]triazole-2-carboxylic acid (S7e)***

The title compound was obtained through filtration as a white solid and directly used in the next step. Yield 99%. <sup>1</sup>H NMR (400 MHz, DMSO-*d*<sub>6</sub>) δ 13.15 (brs, 1H), 4.34 – 4.27 (m, 1H), 2.83 (t, *J* = 7.4 Hz, 2H), 2.76 – 2.65 (m, 1H), 2.47 – 2.39 (m, 1H), 1.94 – 1.84 (m, 1H), 1.83 – 1.66 (m, 3H), 1.63 – 1.58 (m, 1H), 1.29 (s, 1H), 1.28 – 1.06 (m, 4H), 0.94 – 0.83 (m, 1H). LC/MS (ESI) *m/z*: 234.1 [M - H]<sup>-</sup>.

***5-Cyclopentyl-6,7-dihydro-5H-pyrrolo[1,2-b][1,2,4]triazole-2-carboxylic acid (S7f)***

The title compound was obtained through filtration as a white solid and directly used in the next step. Yield 77%. LC/MS (ESI) *m/z*: 220.1 [M - H]<sup>-</sup>.

***Trans-7-Fluoro-5-phenyl-6,7-dihydro-5H-pyrrolo[1,2-b][1,2,4]triazole-2-carboxylic acid (S7g)***

The title compound was obtained through filtration as a white solid and directly used in the next step. Yield 99%. LC/MS (ESI) *m/z*: 246.0 [M - H]<sup>-</sup>.

***Cis-7-Fluoro-5-phenyl-6,7-dihydro-5H-pyrrolo[1,2-b][1,2,4]triazole-2-carboxylic acid (S7h), (5R,7R)-7-fluoro-5-phenyl-6,7-dihydro-5H-pyrrolo[1,2-b][1,2,4]triazole-2-carboxylic acid (S11a) and (5S,7S)-7-fluoro-5-phenyl-6,7-dihydro-5H-pyrrolo[1,2-b][1,2,4]triazole-2-carboxylic acid (S11b)***

The title compound was obtained through filtration as a white solid and directly used in the next step. Yield 76%. <sup>1</sup>H NMR (400 MHz, DMSO-*d*<sub>6</sub>) δ 13.51 (brs, 1H), 7.47 – 7.36 (m, 3H), 7.28 – 7.23 (m, 2H), 6.22 (dd, <sup>2</sup>*J*<sub>H-F</sub> = 56.5 Hz, *J* = 6.9 Hz, 1H), 5.73 – 5.67 (m, 1H), 3.82 – 3.65 (m, 1H), 2.70 (dd, <sup>3</sup>*J*<sub>H-F</sub> = 27.8, *J* = 14.8 Hz, 1H). LC/MS (ESI) *m/z*: 246.0 [M - H]<sup>-</sup>.

## 2. NMR spectra of target compounds

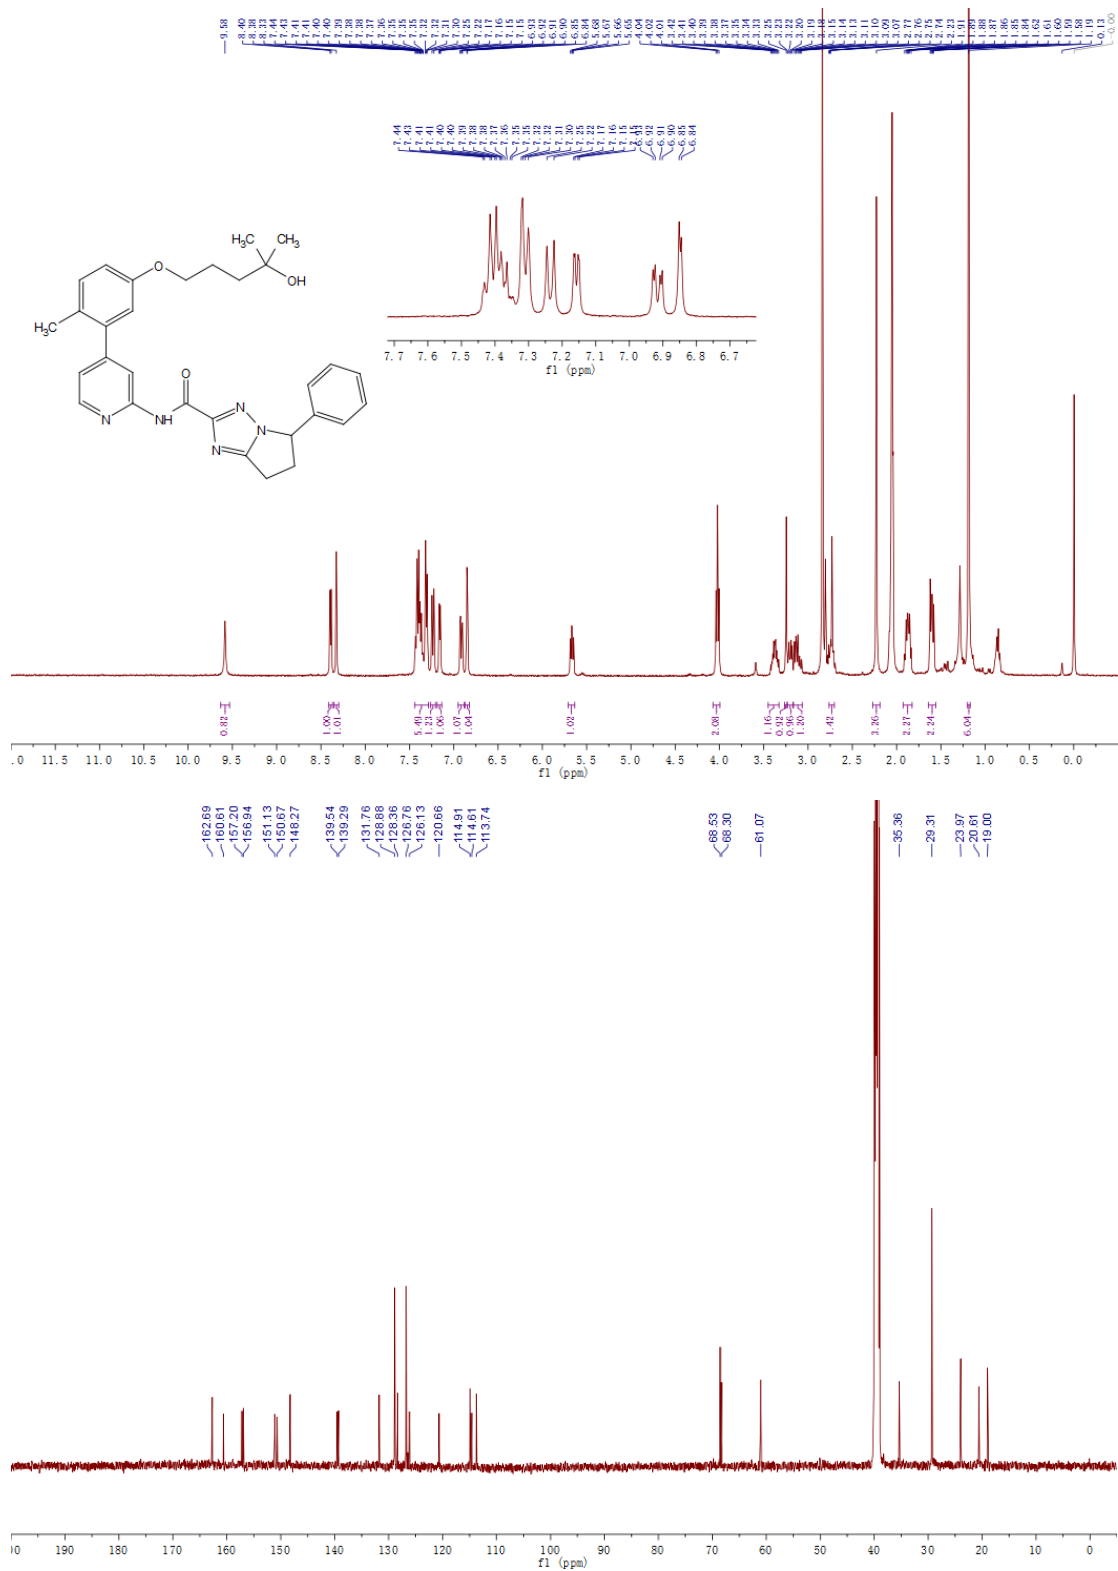

<sup>1</sup>H and <sup>13</sup>C NMR spectra of compound 7

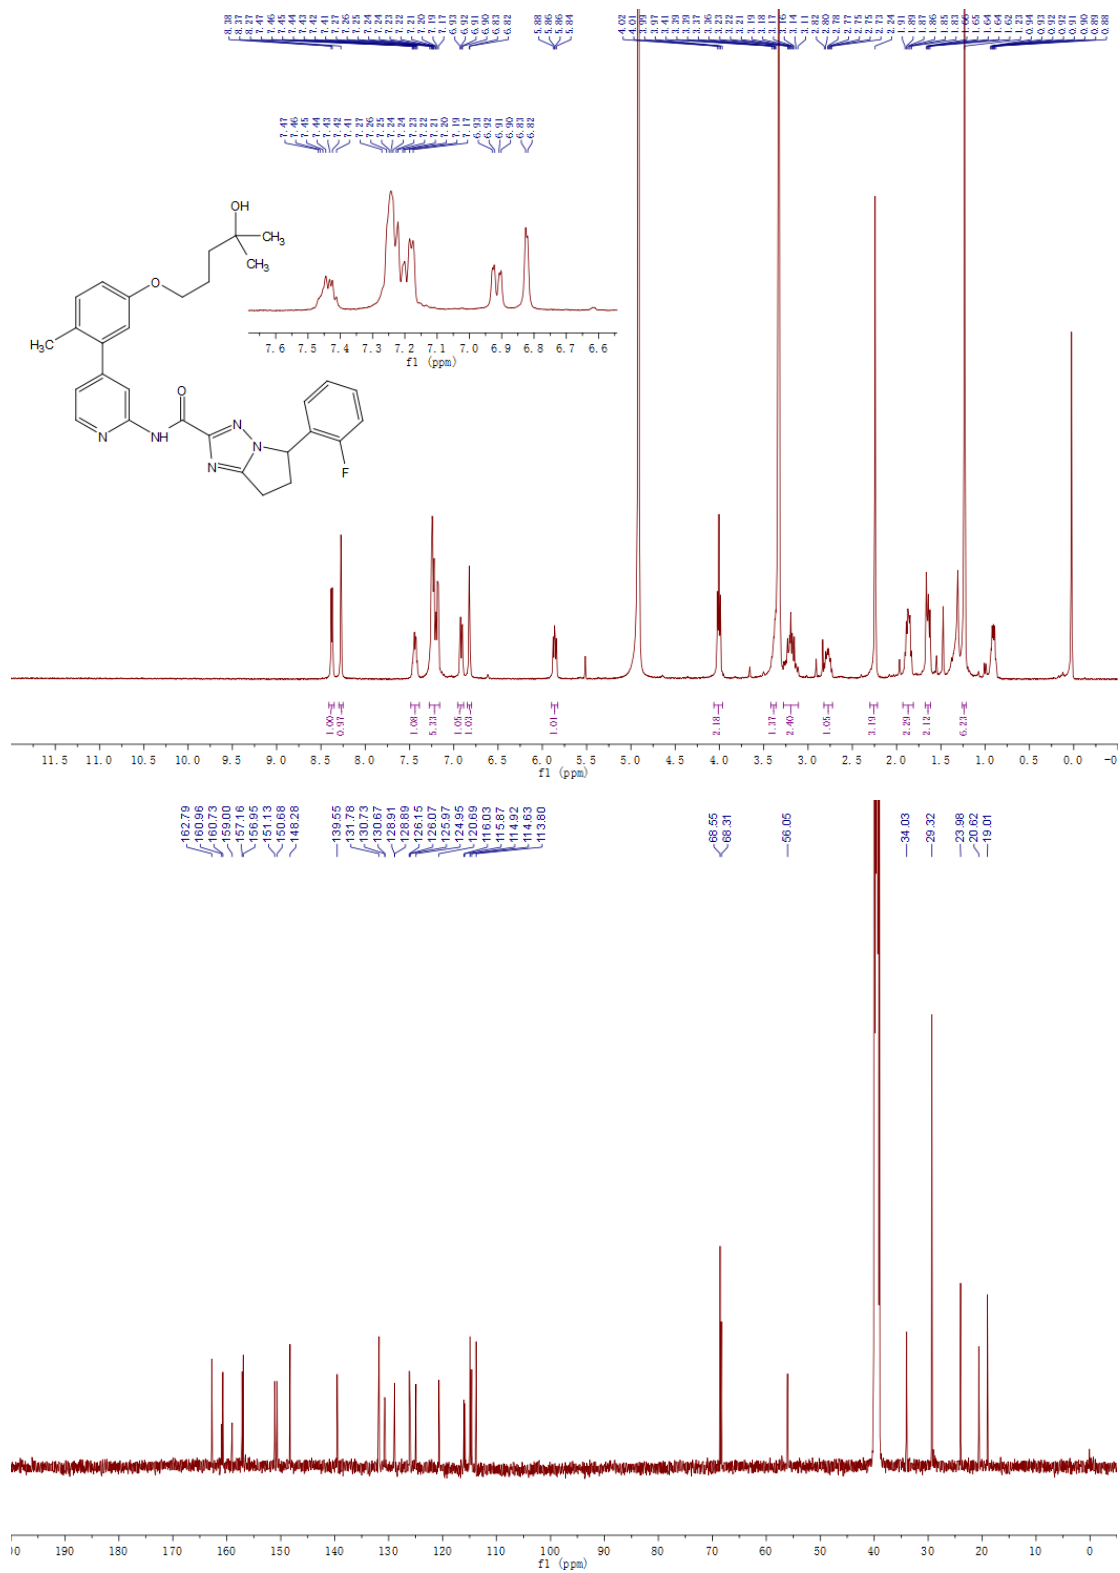

<sup>1</sup>H and <sup>13</sup>C NMR spectra of compound **8**

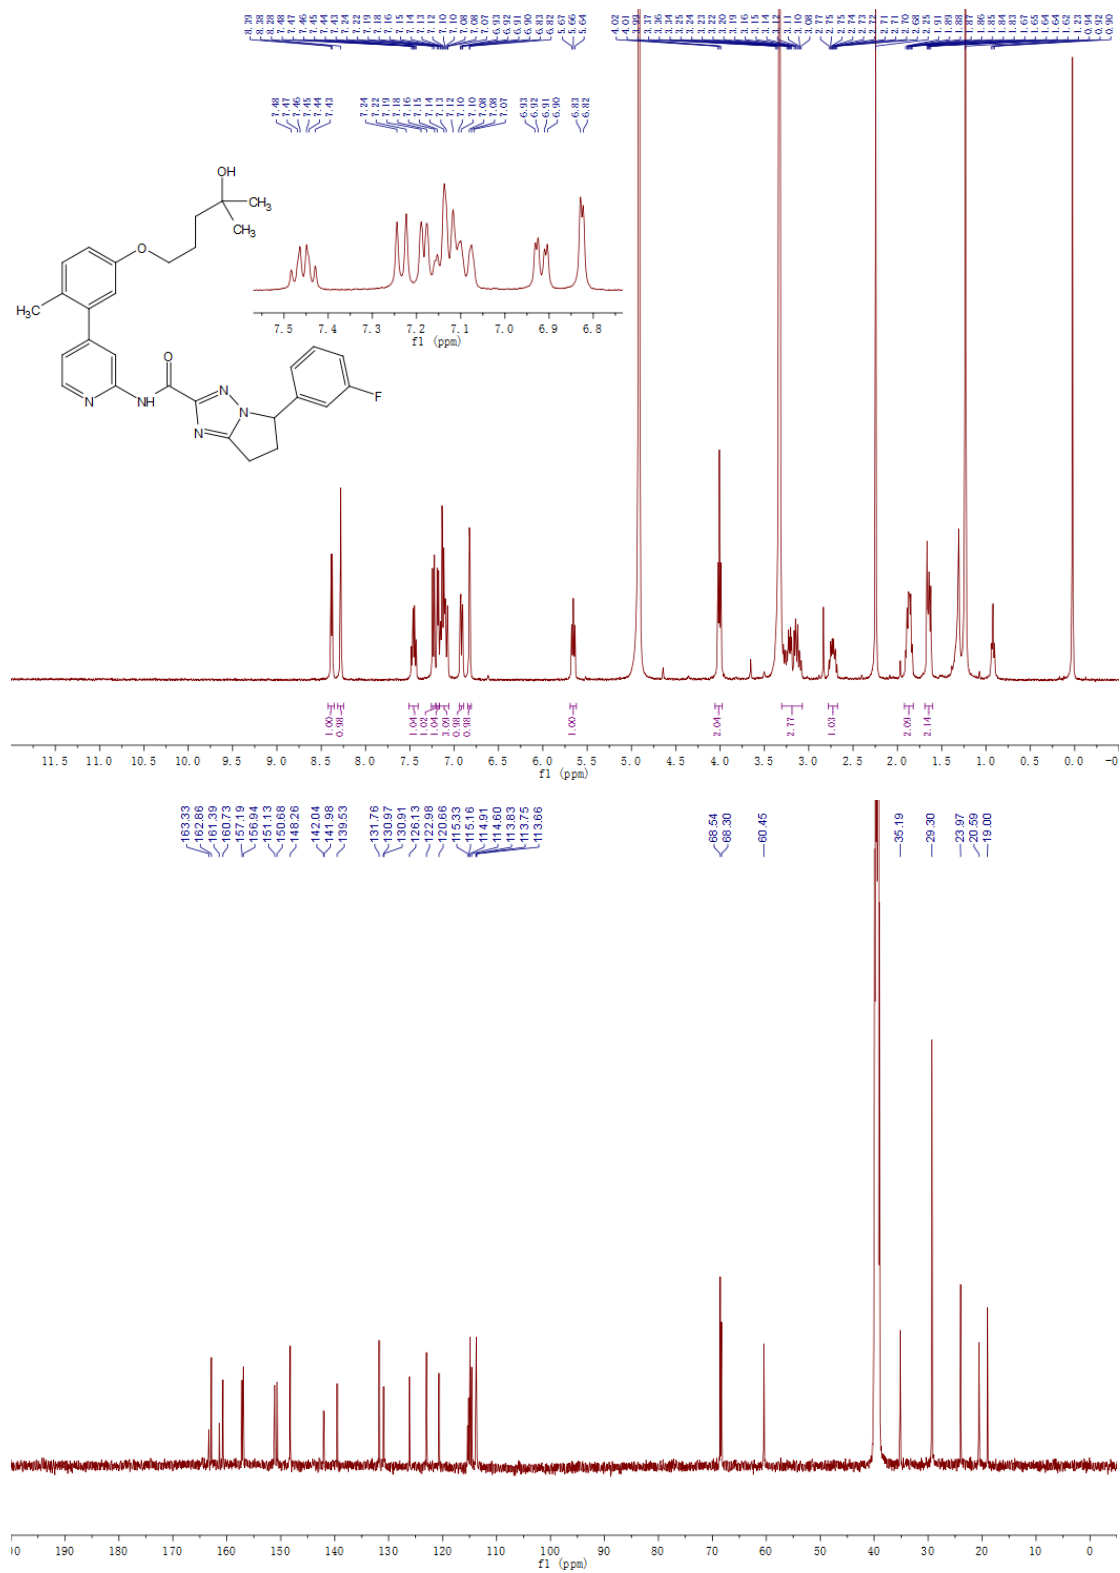

<sup>1</sup>H and <sup>13</sup>C NMR spectra of compound 9



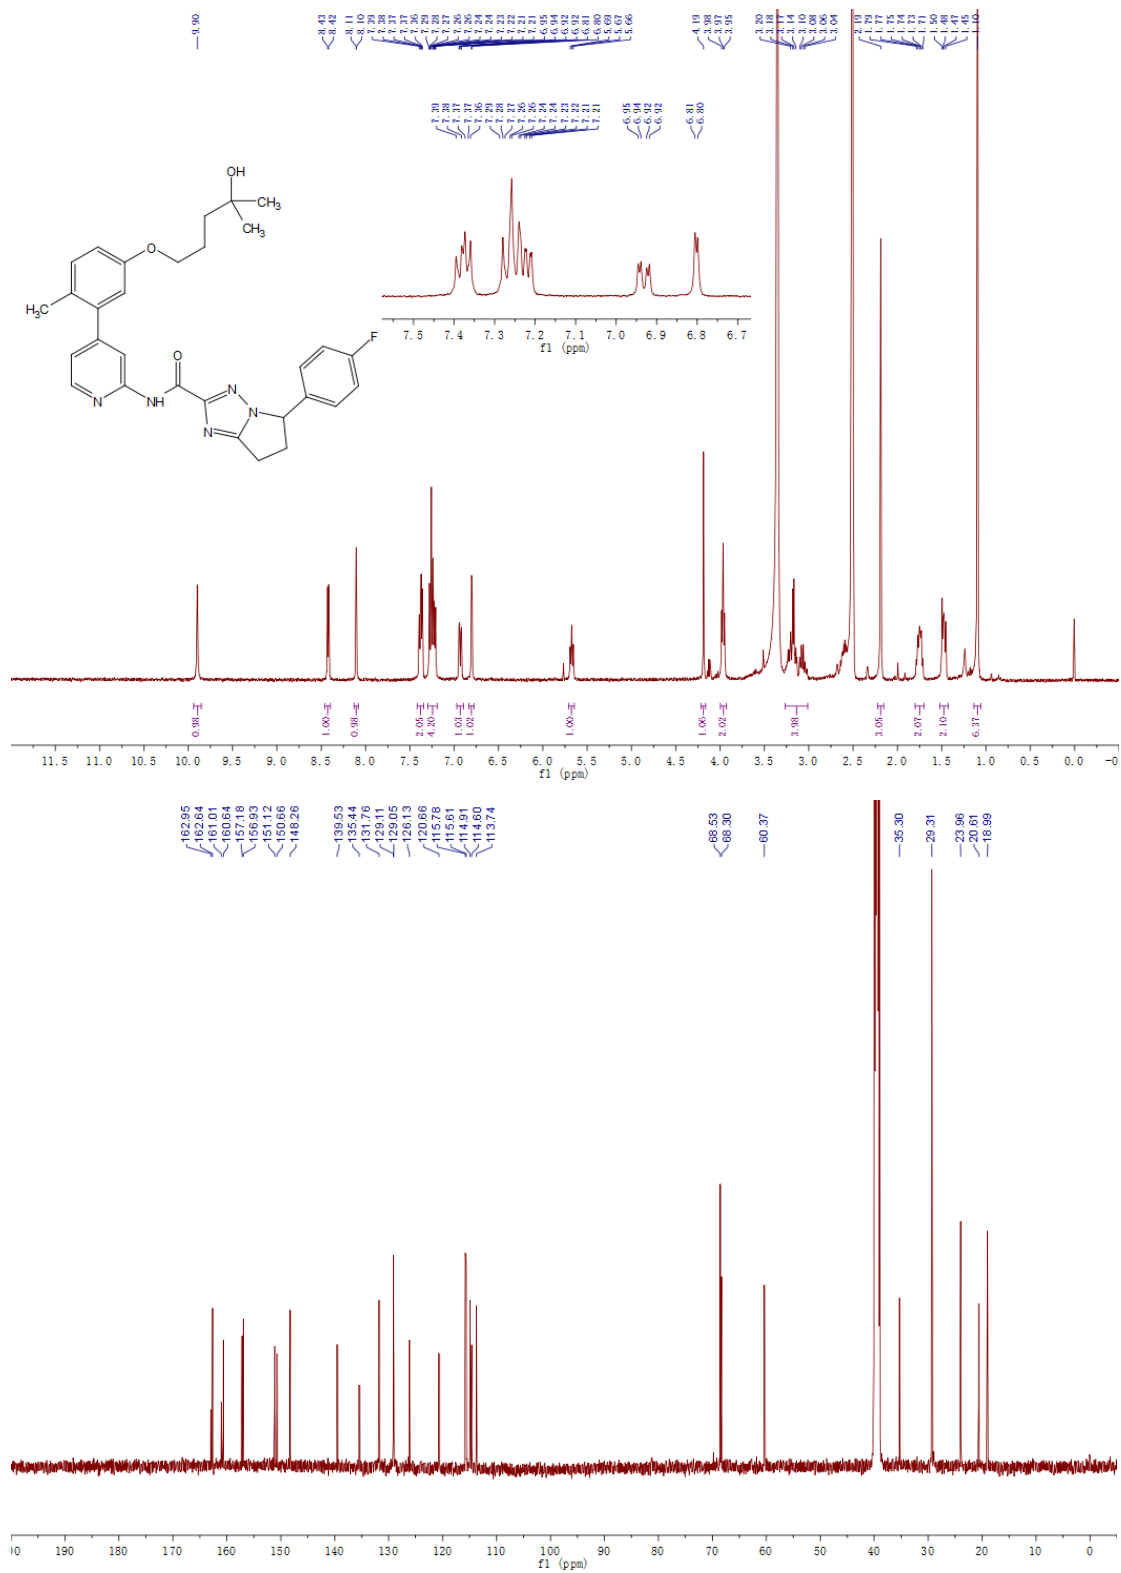

<sup>1</sup>H and <sup>13</sup>C NMR spectra of compound 10



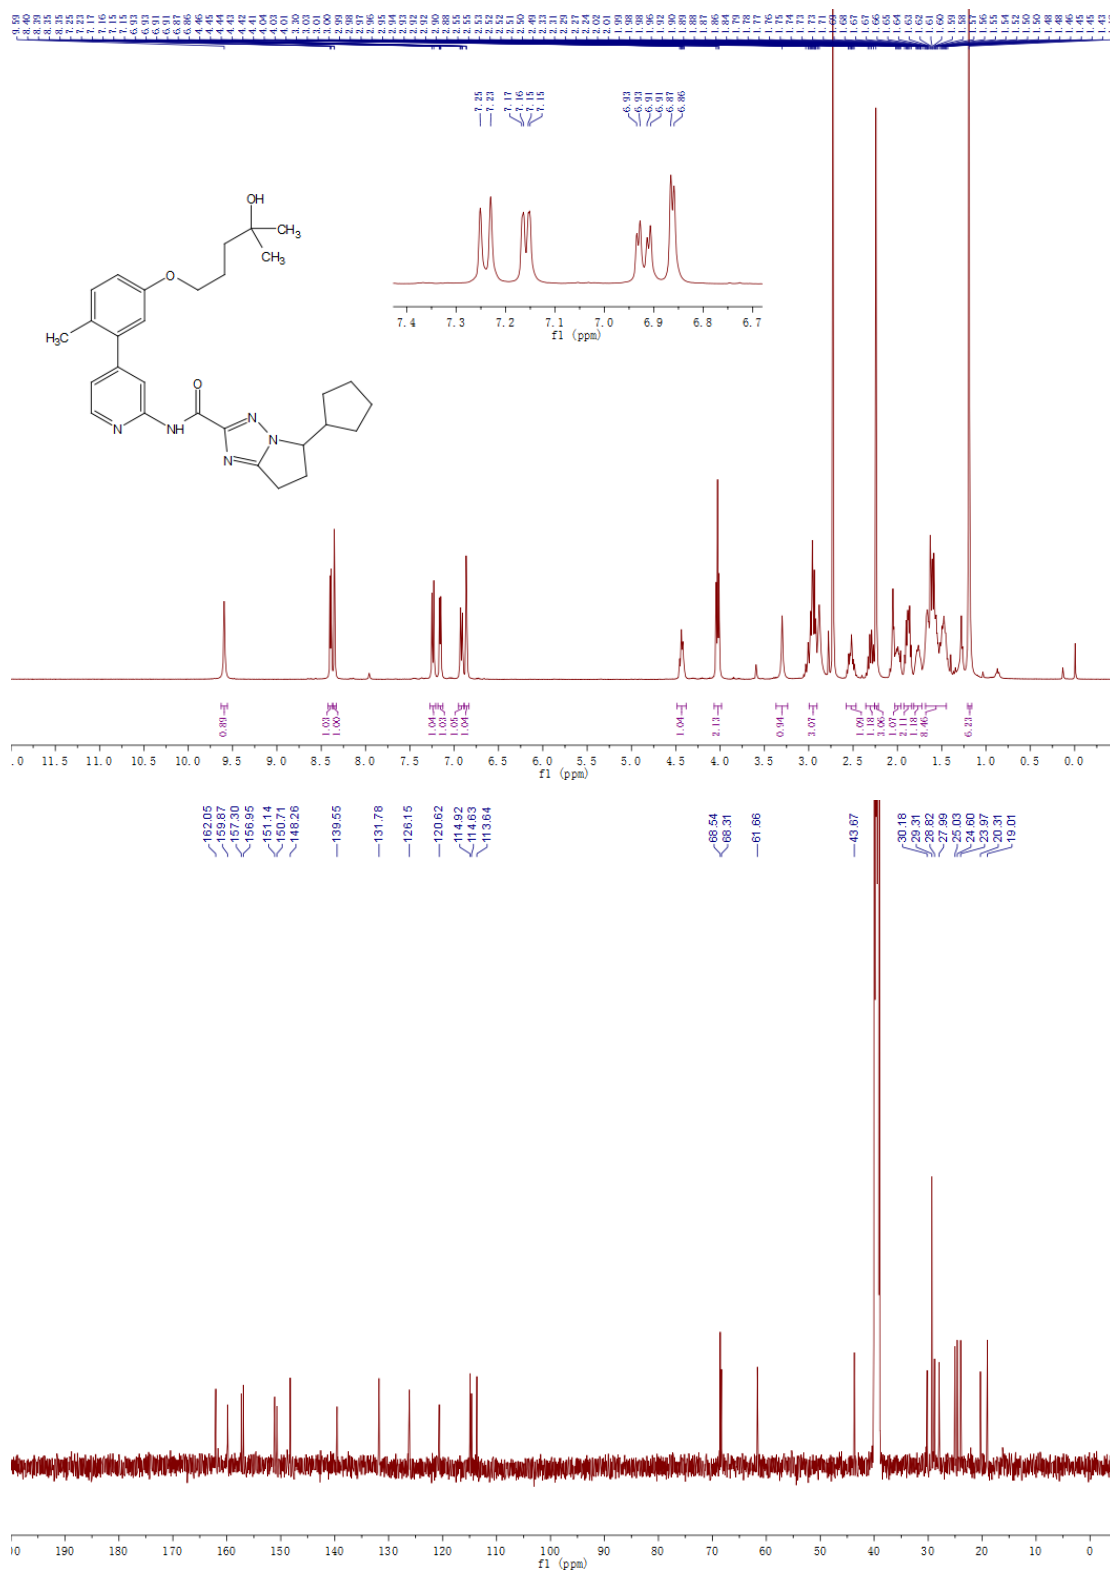

<sup>1</sup>H and <sup>13</sup>C NMR spectra of compound 12



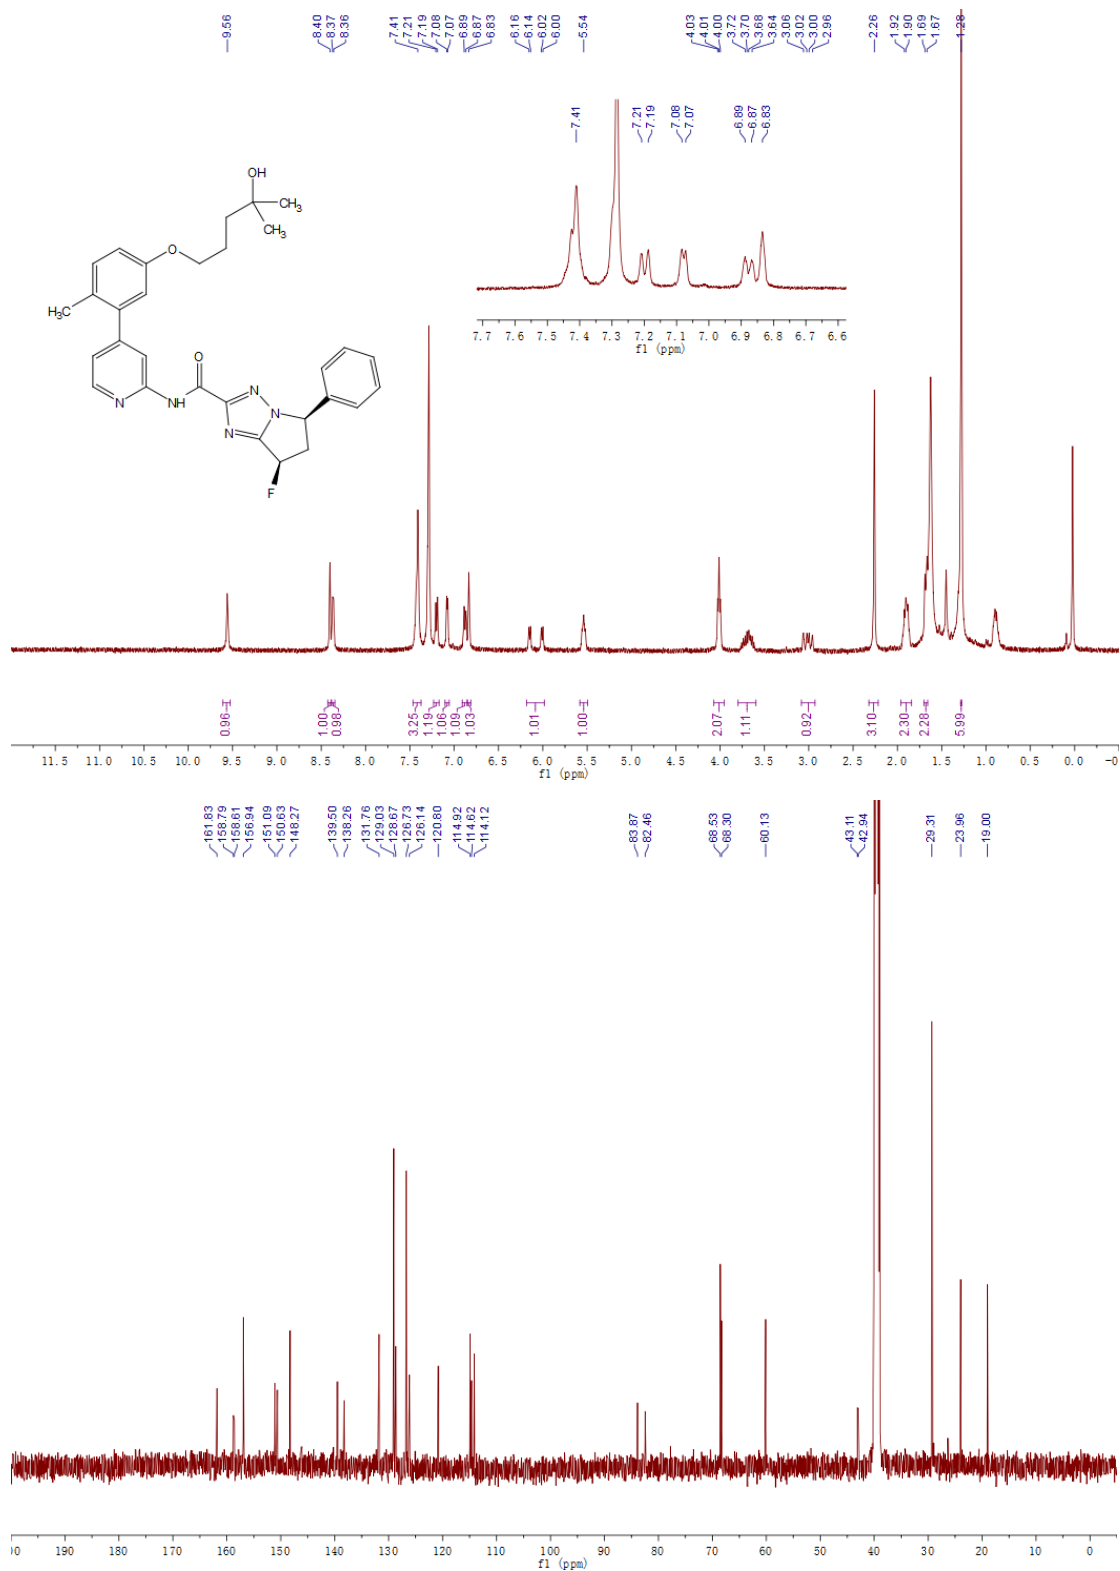

<sup>1</sup>H and <sup>13</sup>C NMR spectra of compound 14

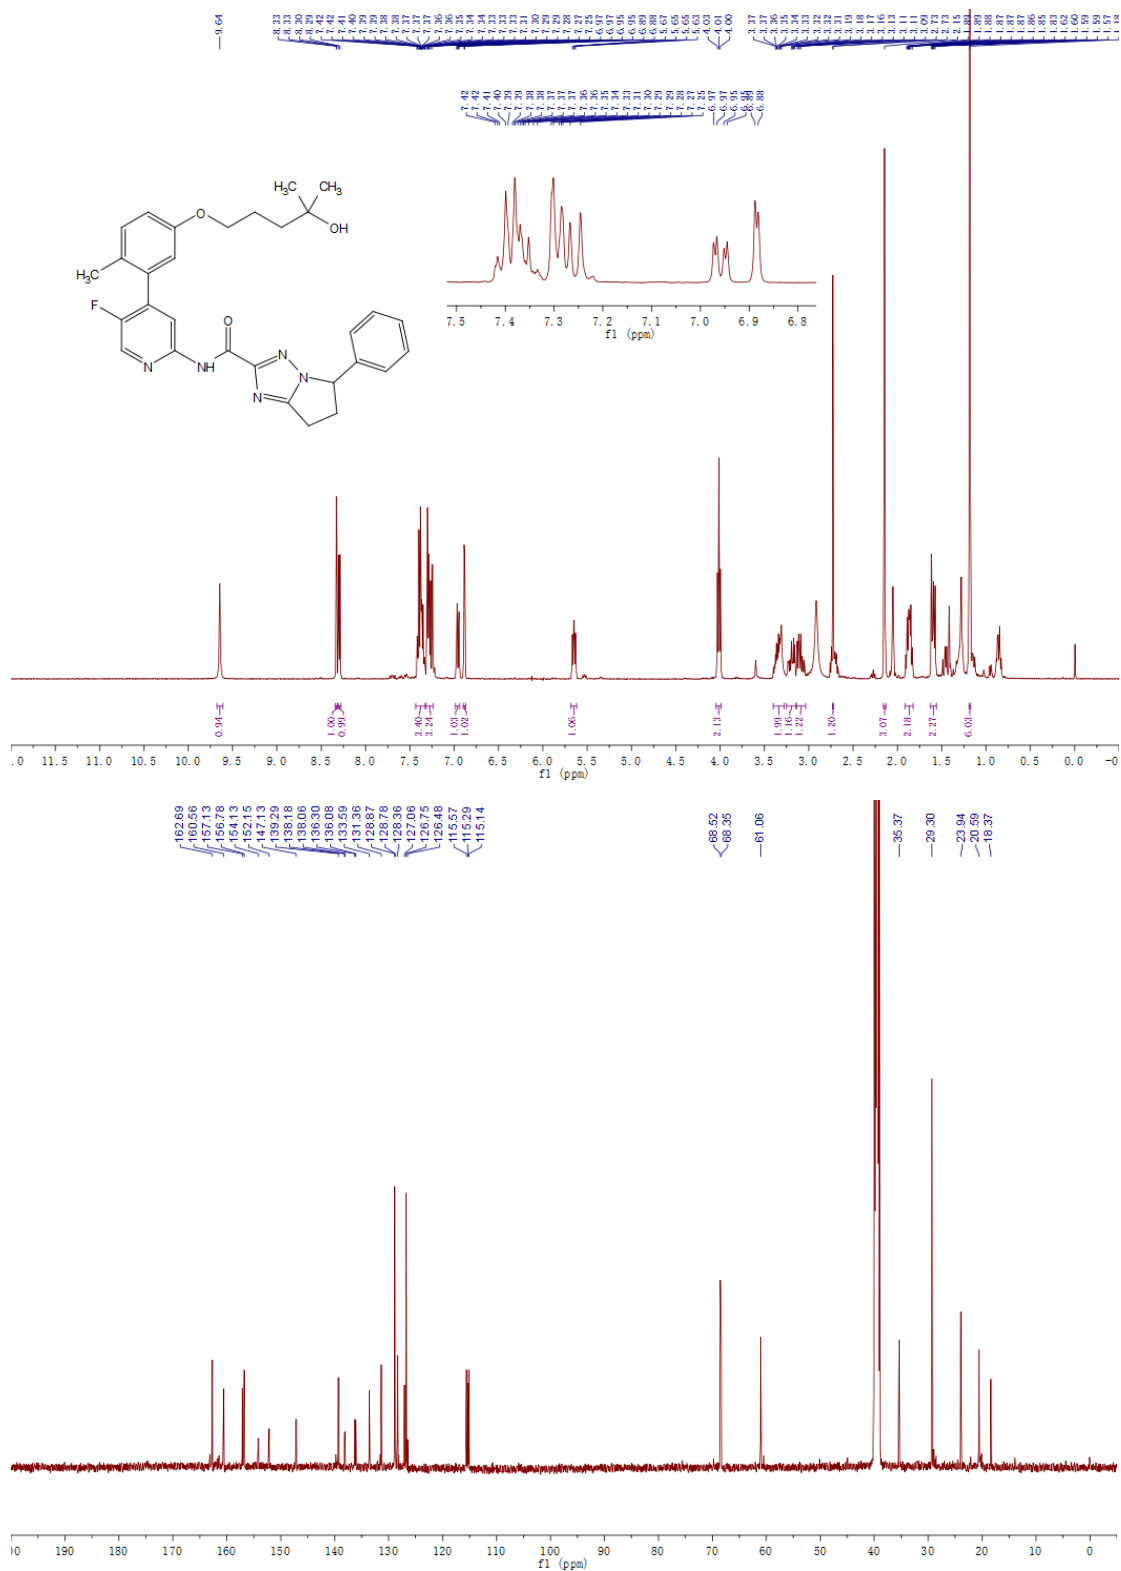

<sup>1</sup>H and <sup>13</sup>C NMR spectra of compound 15

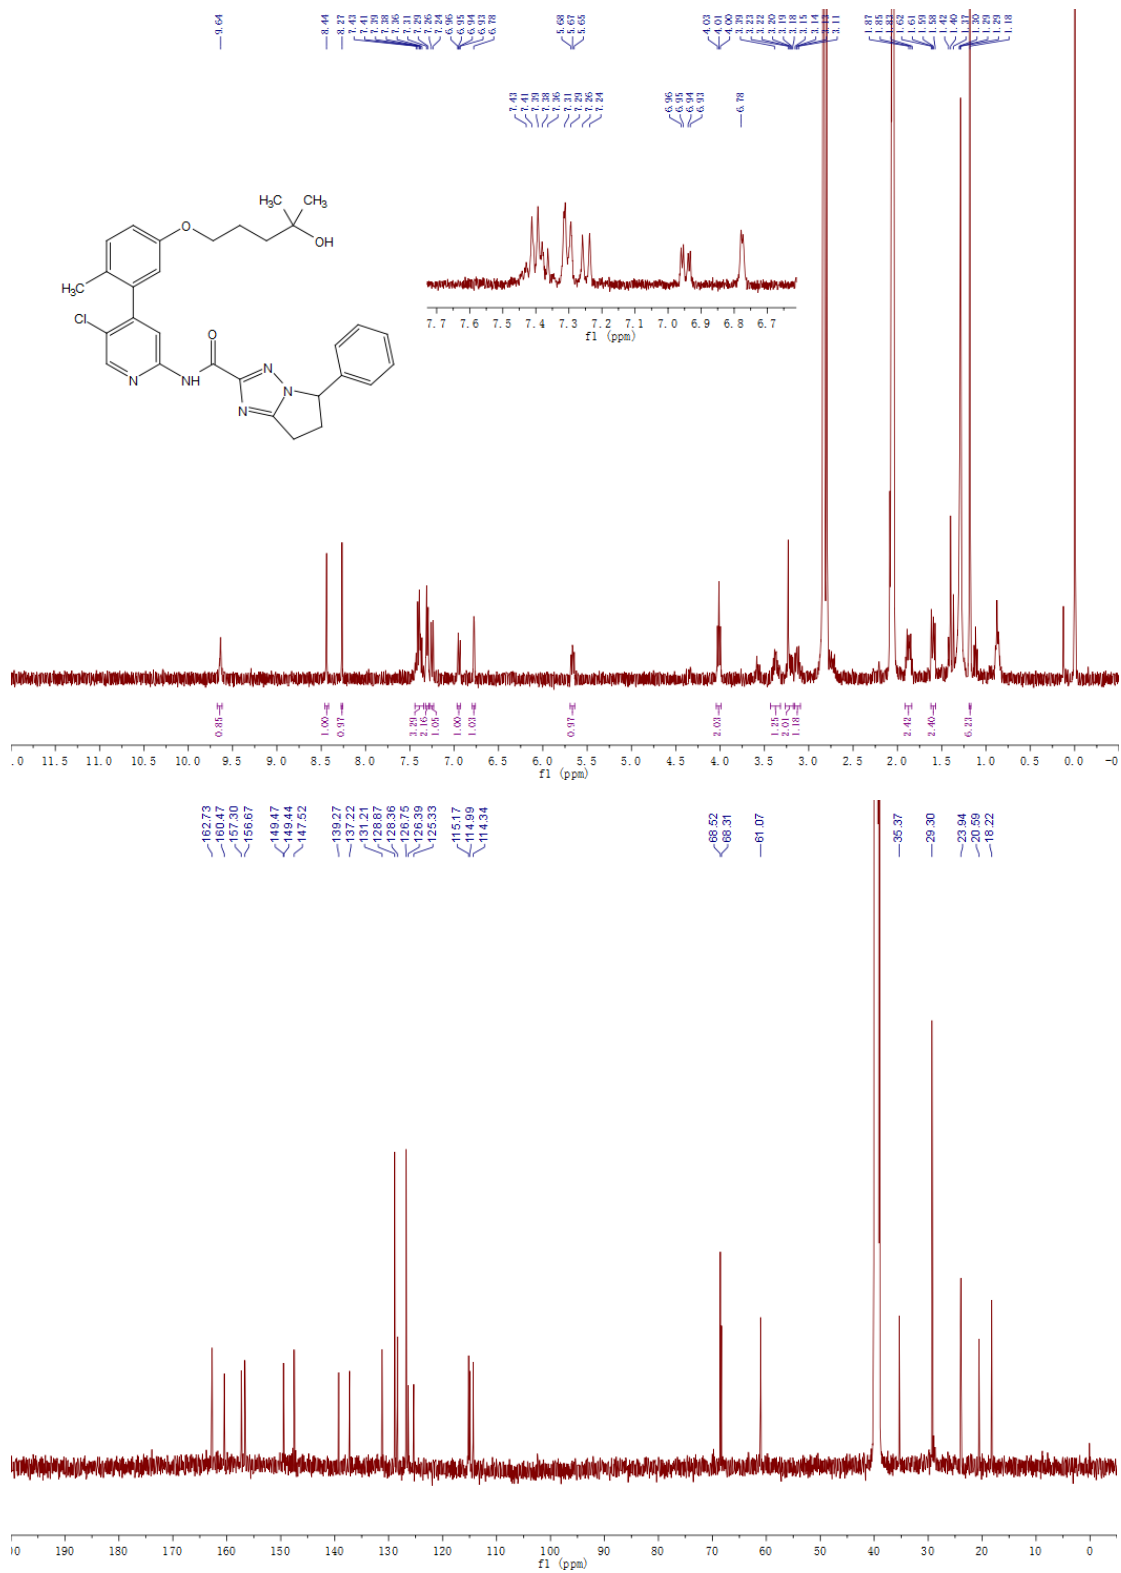

<sup>1</sup>H and <sup>13</sup>C NMR spectra of compound 16

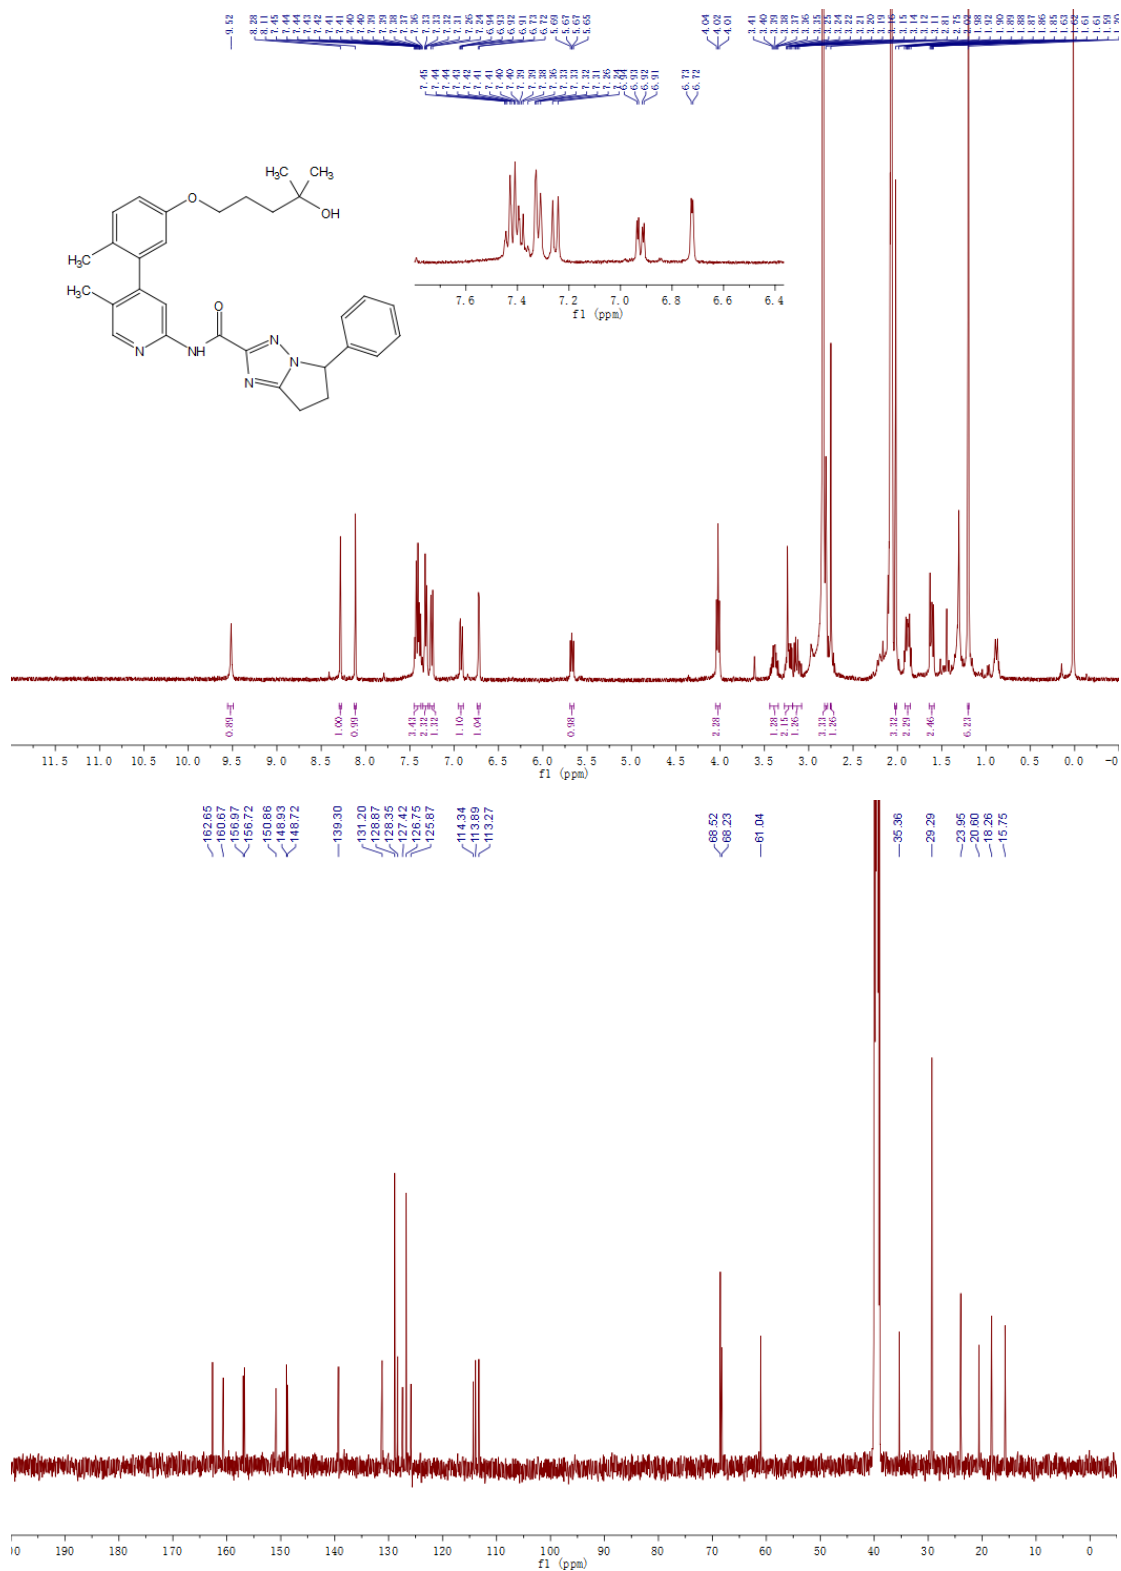

<sup>1</sup>H and <sup>13</sup>C NMR spectra of compound 17



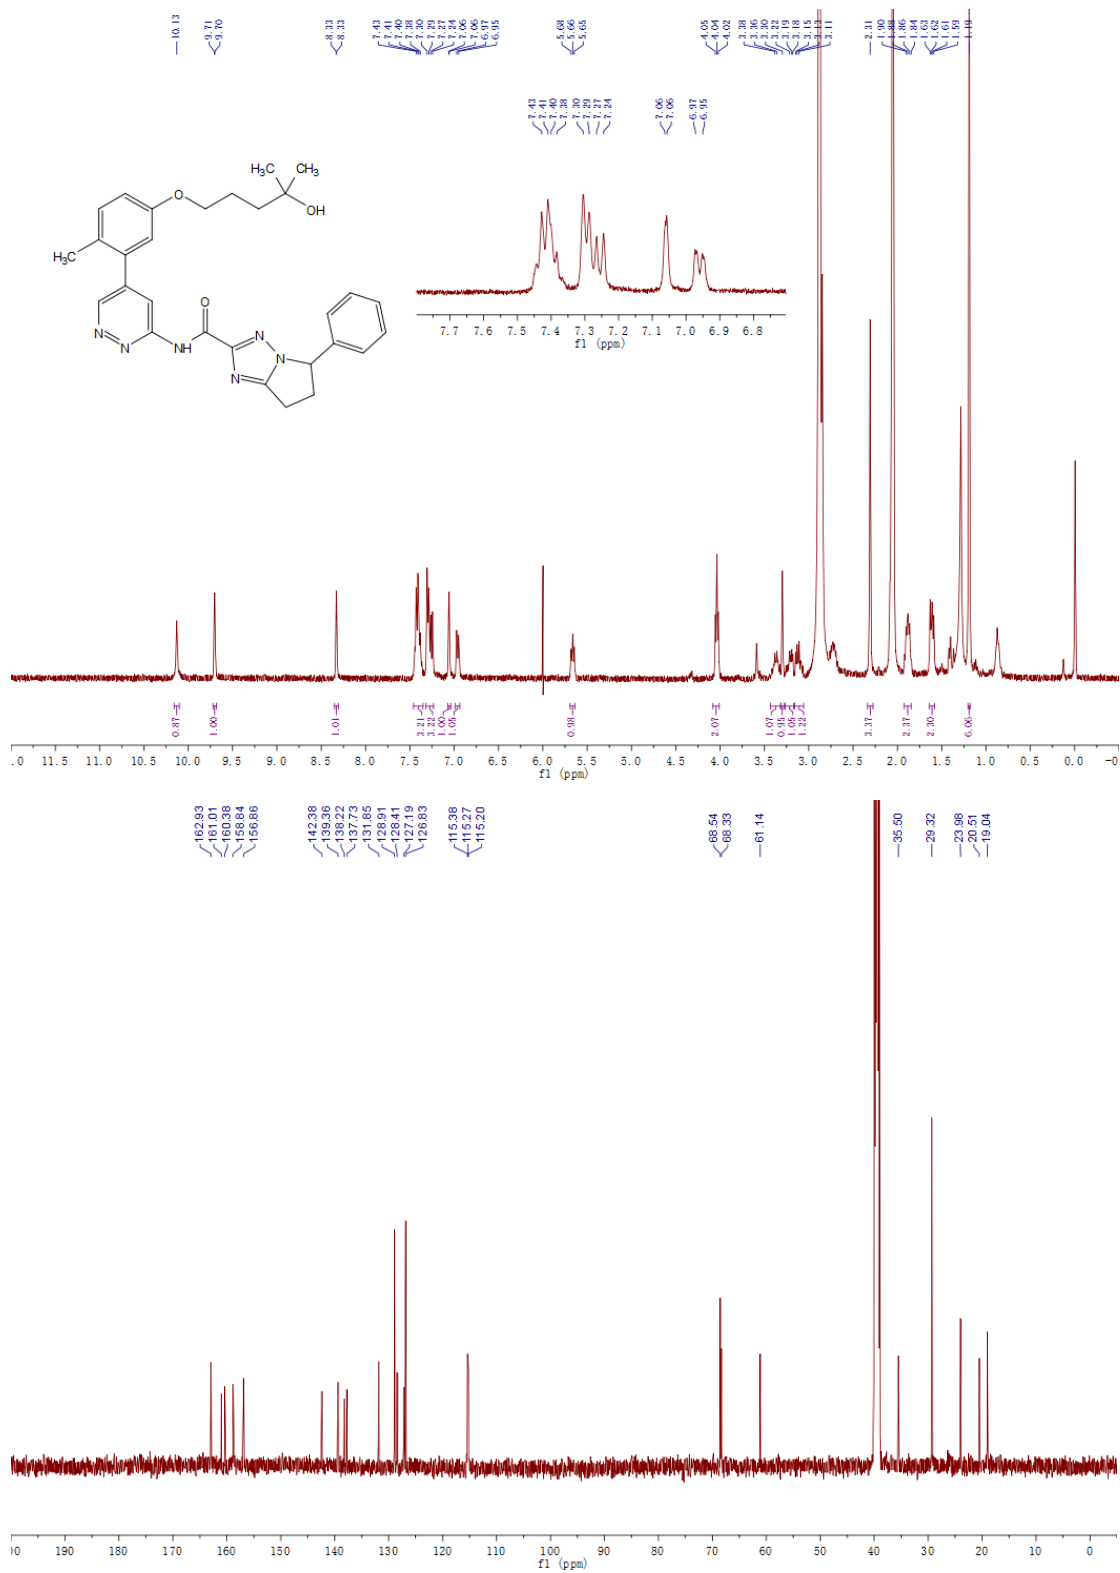

$^1\text{H}$  and  $^{13}\text{C}$  NMR spectra of compound 18



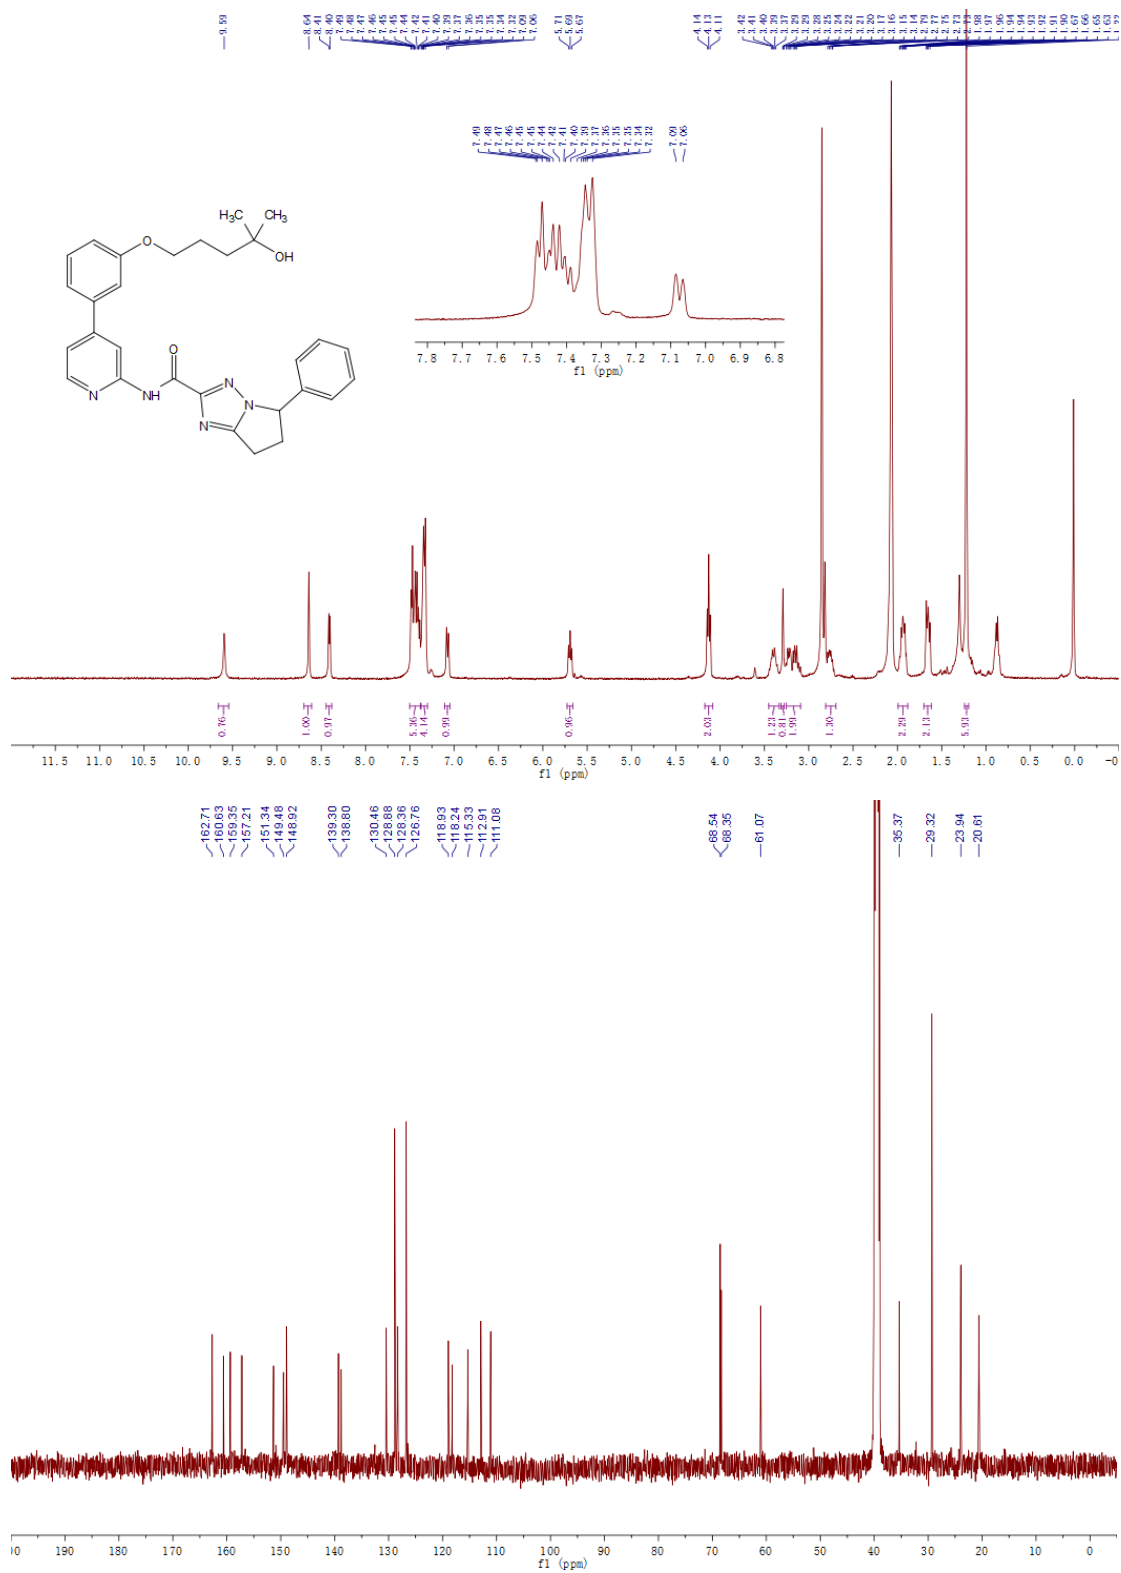

<sup>1</sup>H and <sup>13</sup>C NMR spectra of compound 20

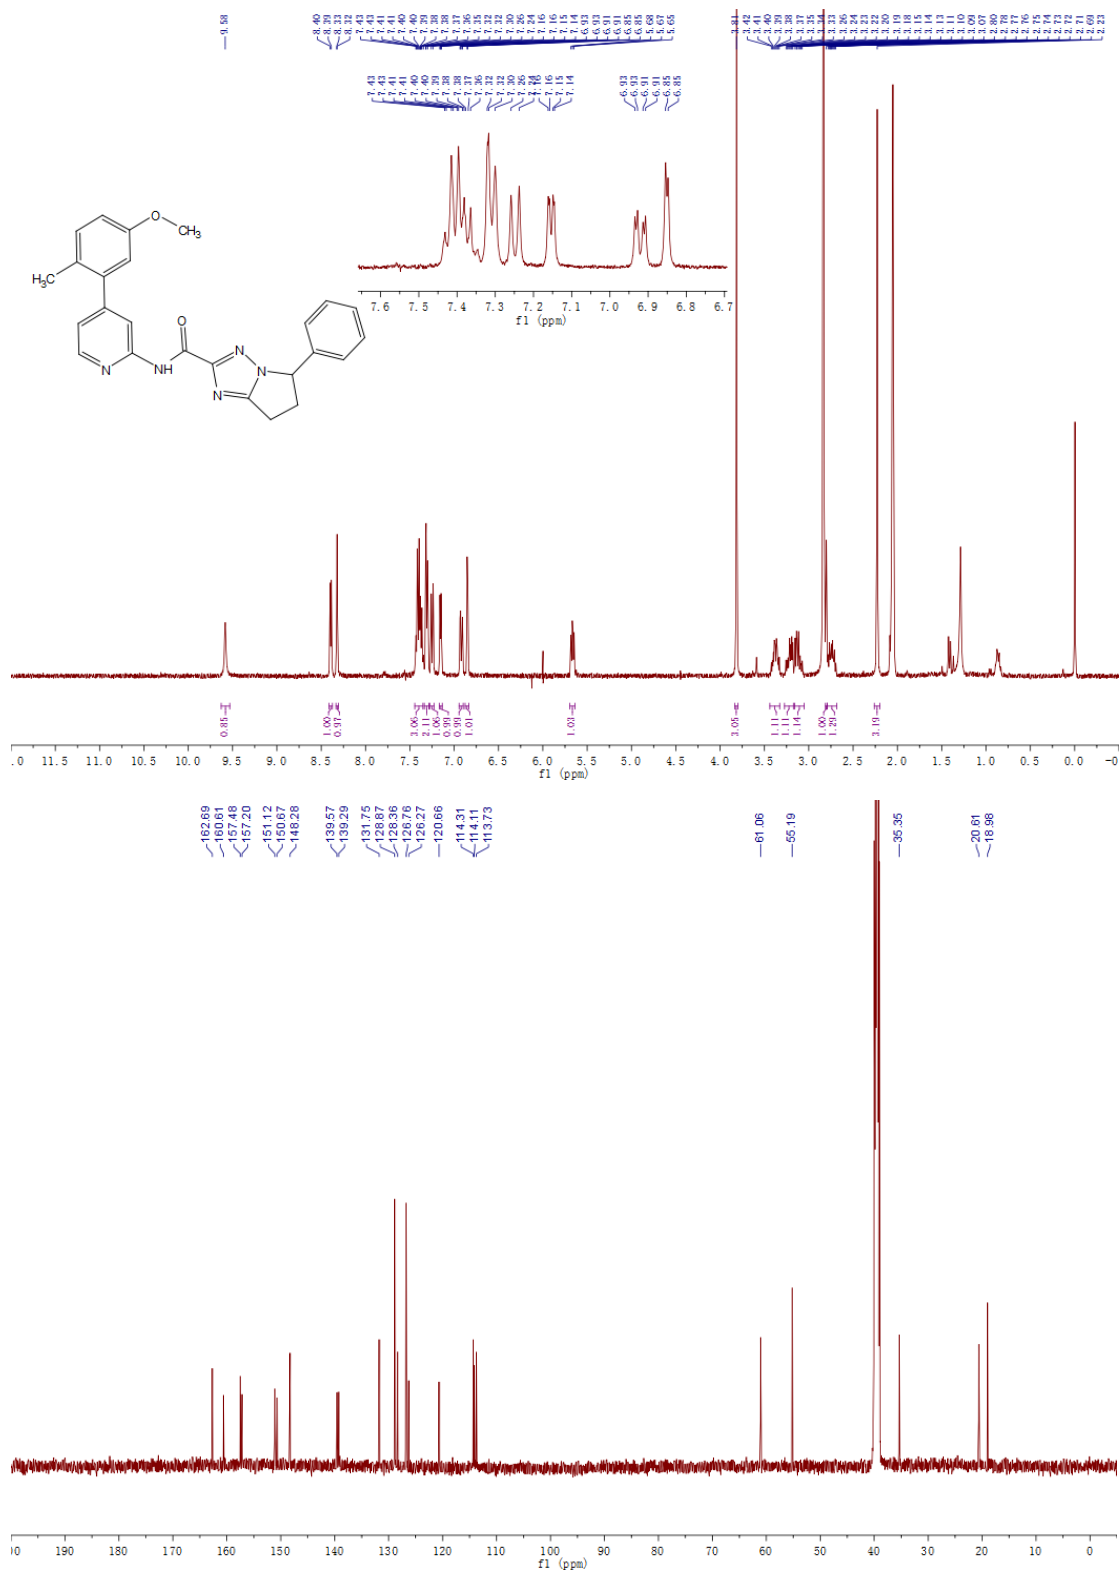

<sup>1</sup>H and <sup>13</sup>C NMR spectra of compound 21

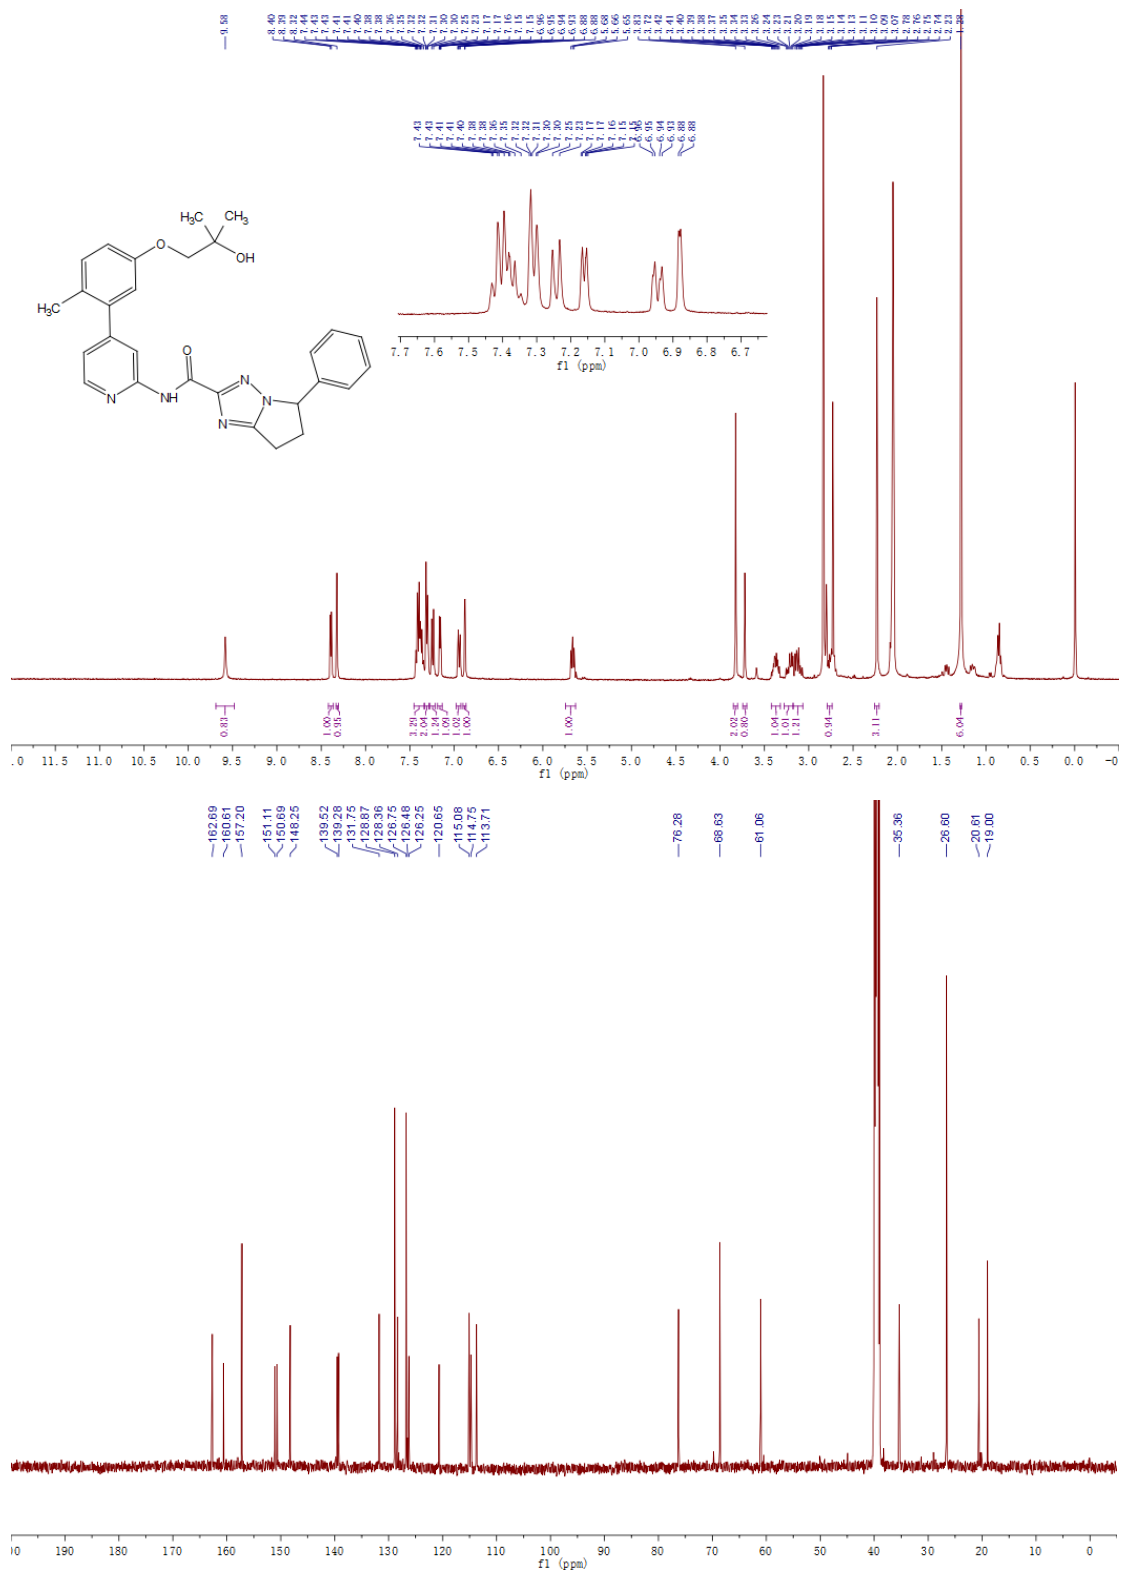

<sup>1</sup>H and <sup>13</sup>C NMR spectra of compound 22

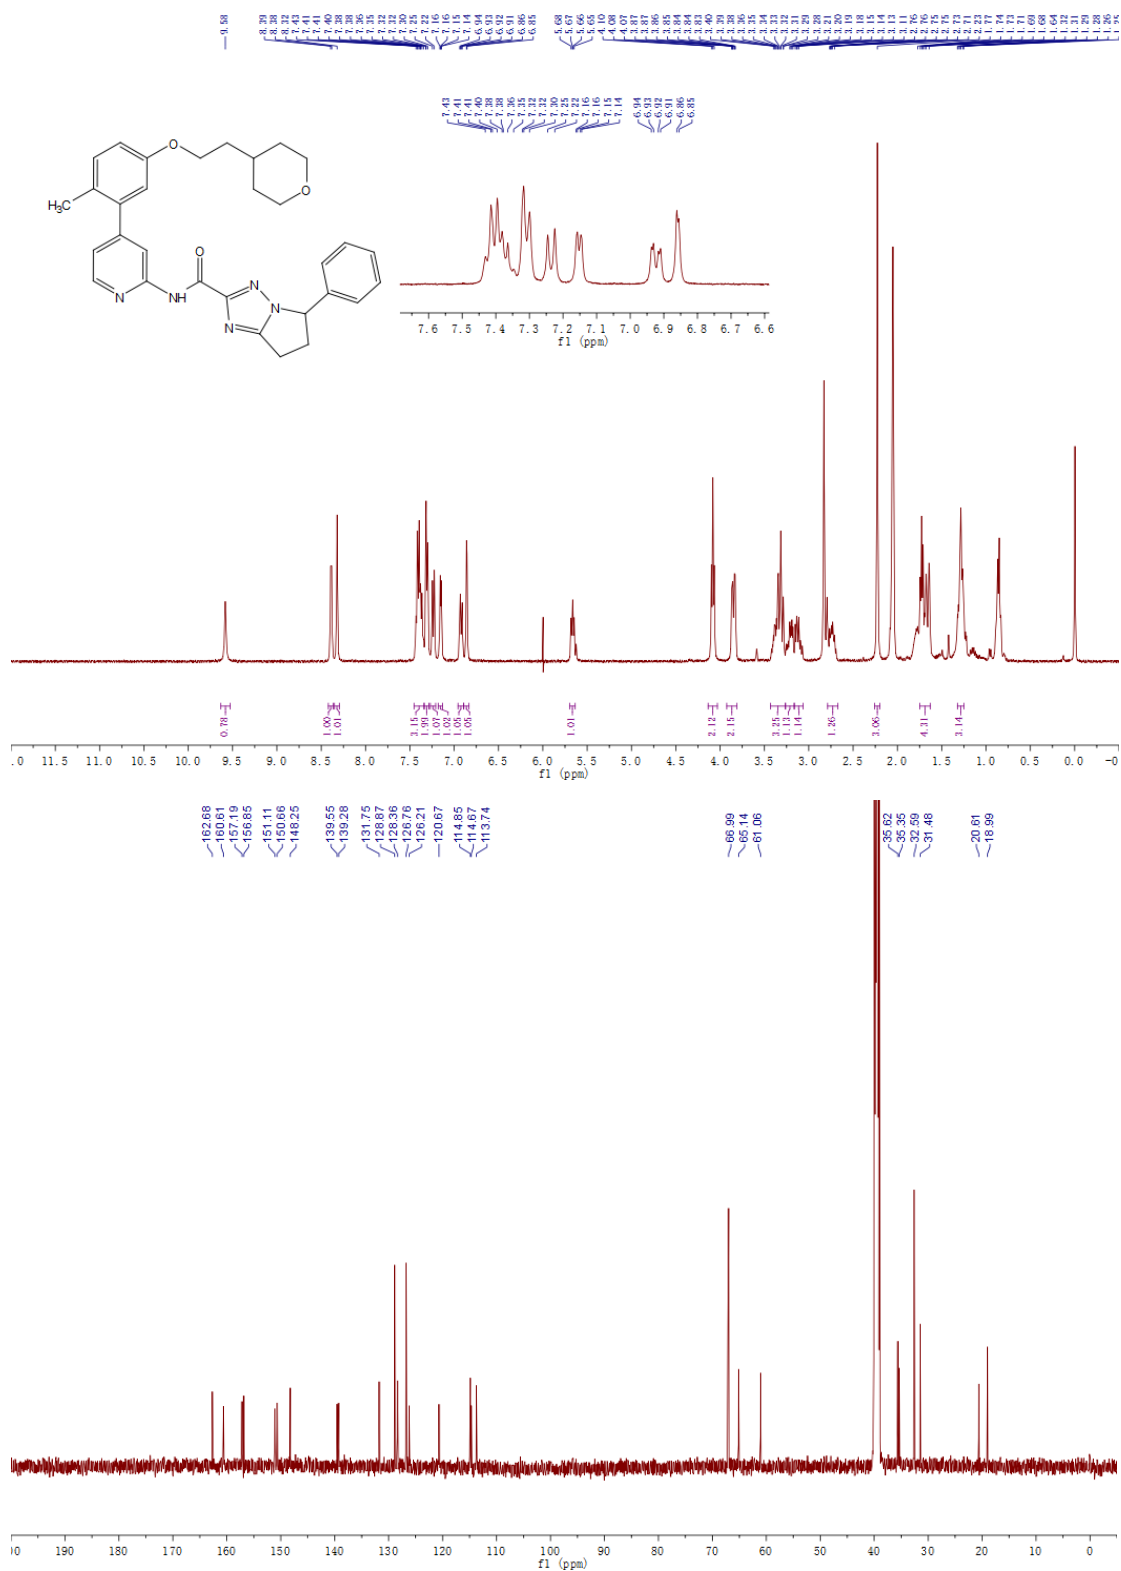

<sup>1</sup>H and <sup>13</sup>C NMR spectra of compound 23

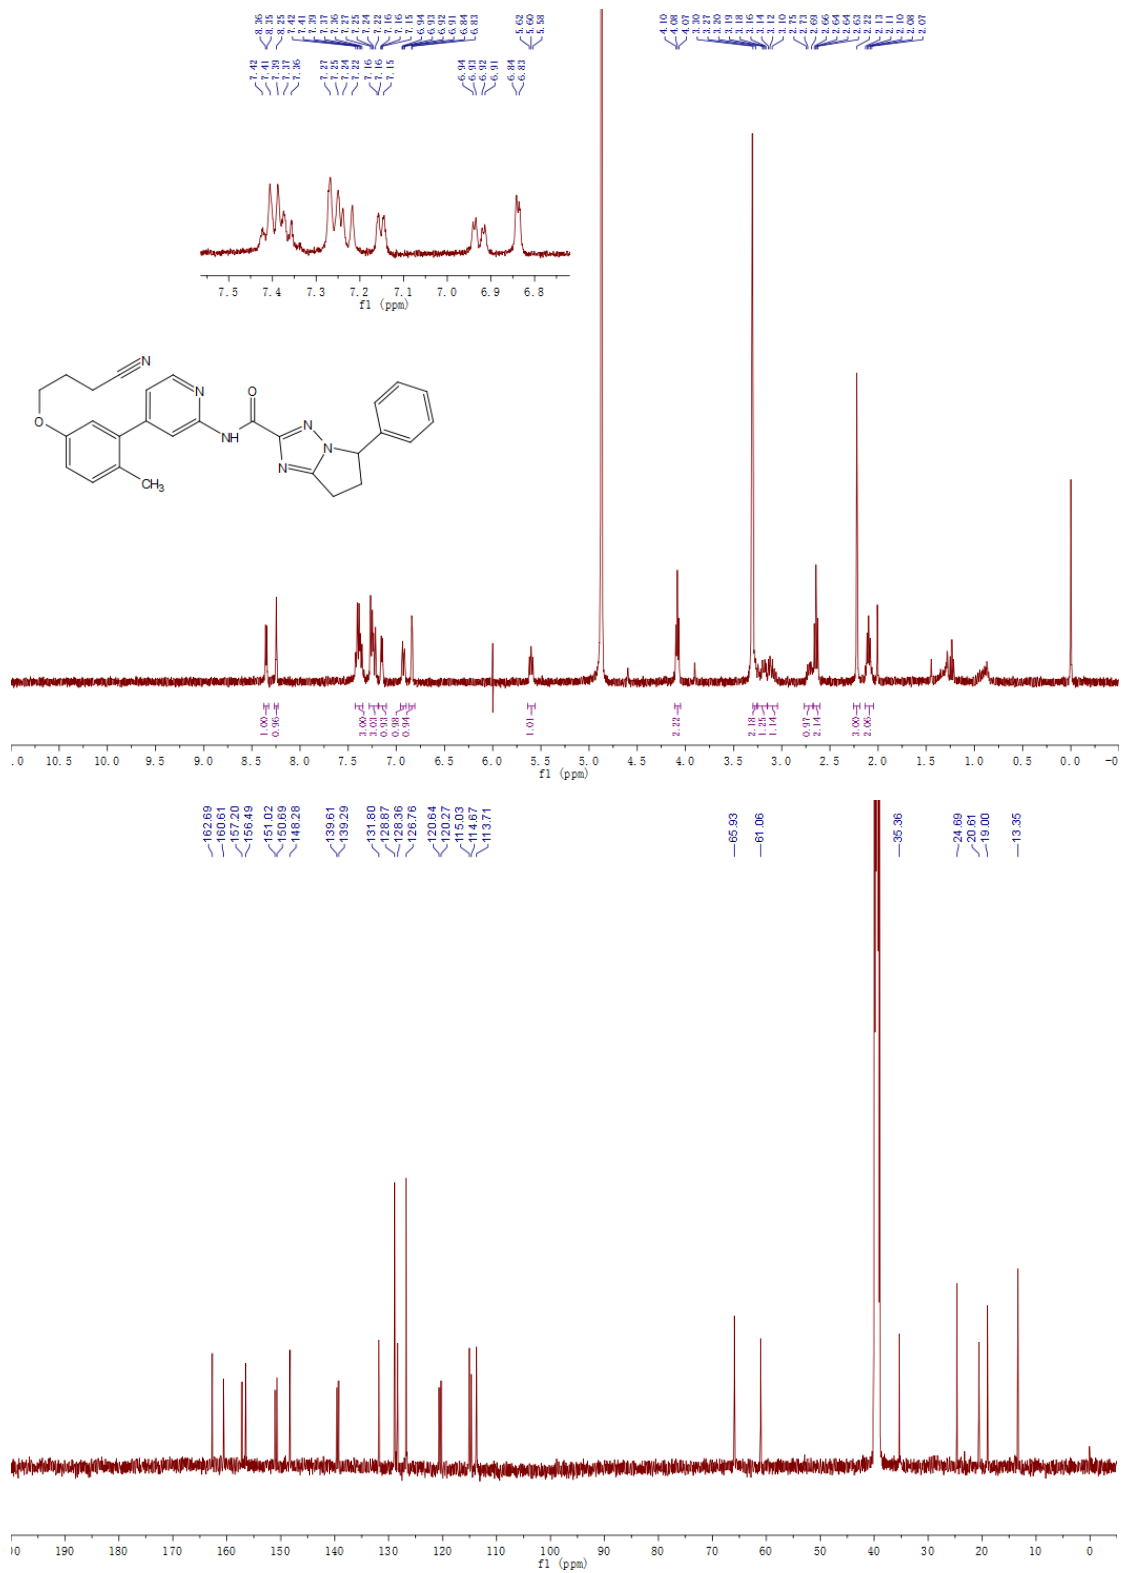

<sup>1</sup>H and <sup>13</sup>C NMR spectra of compound 24

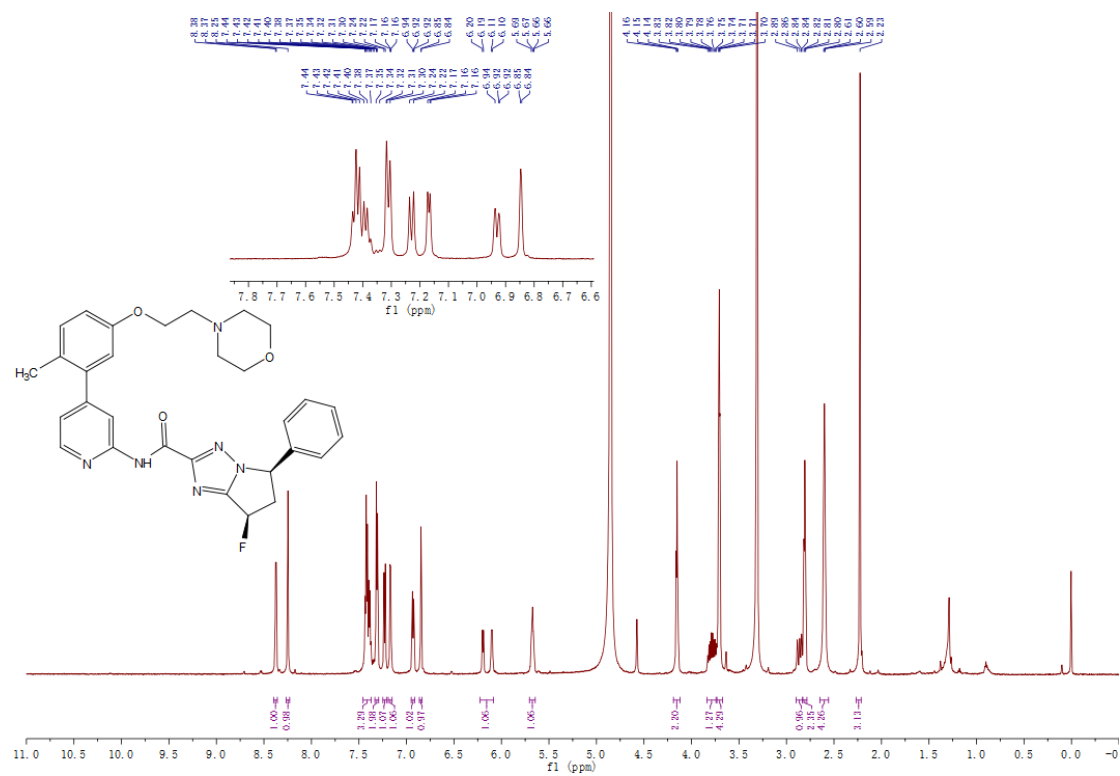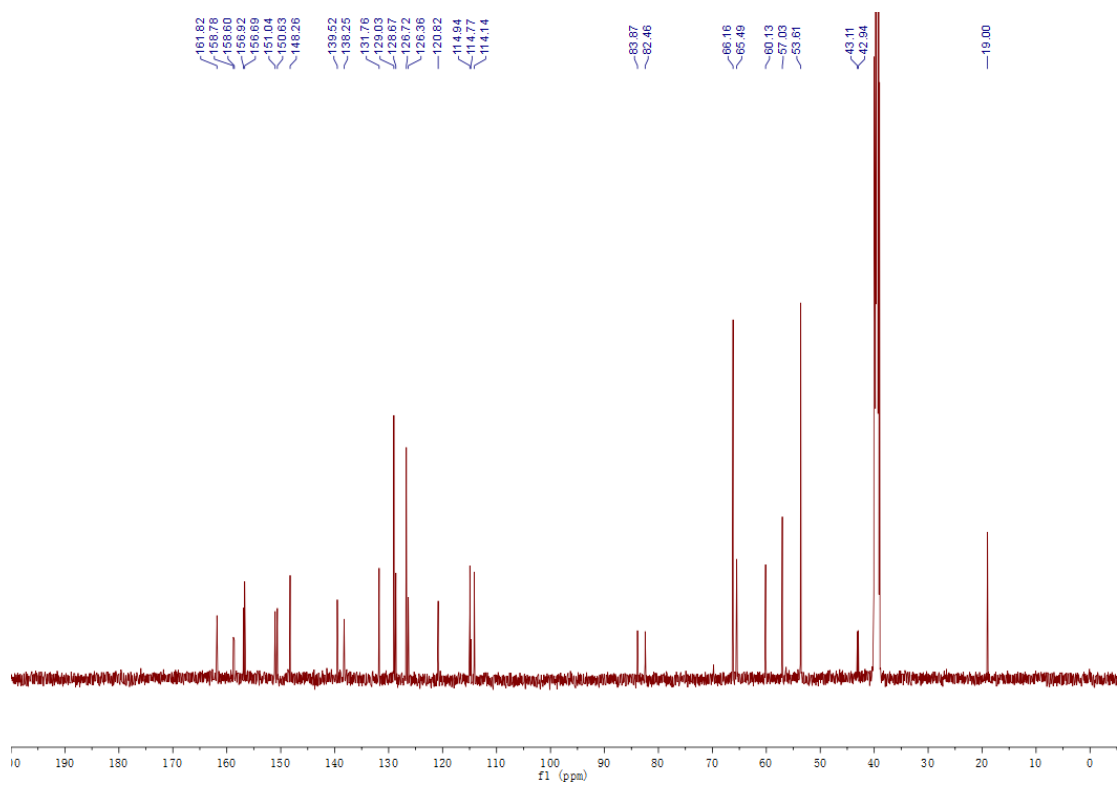

<sup>1</sup>H and <sup>13</sup>C NMR spectra of compound **25**



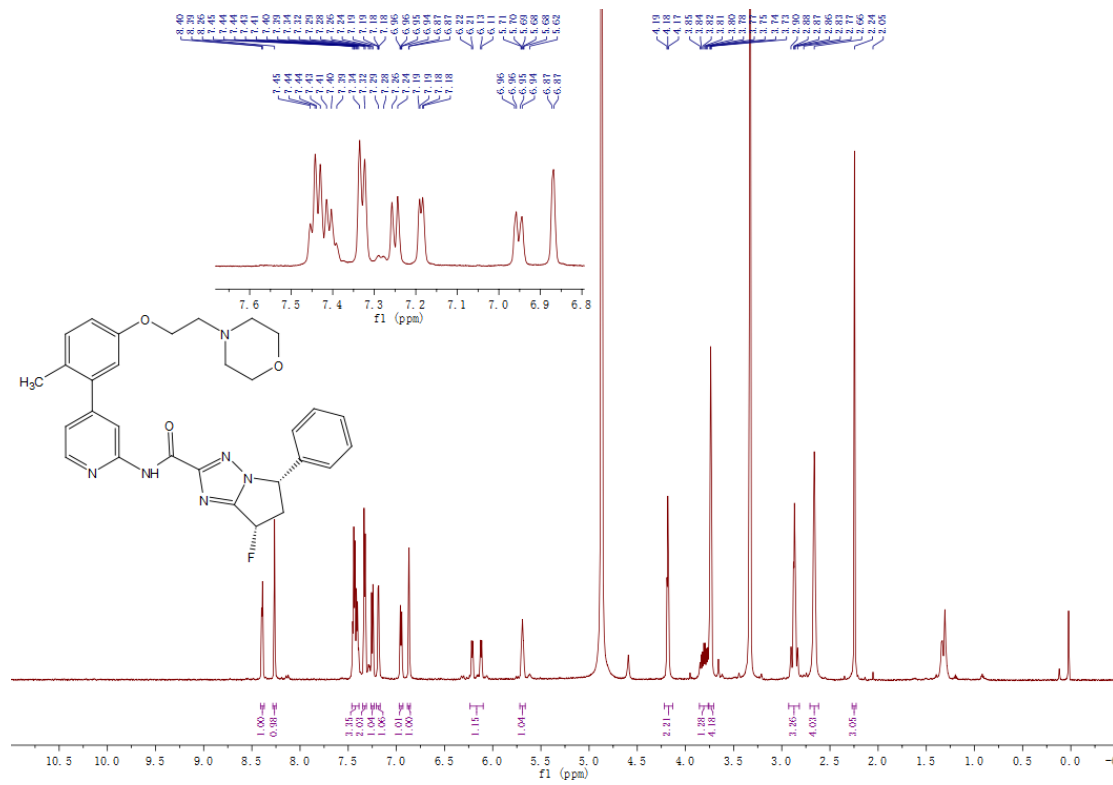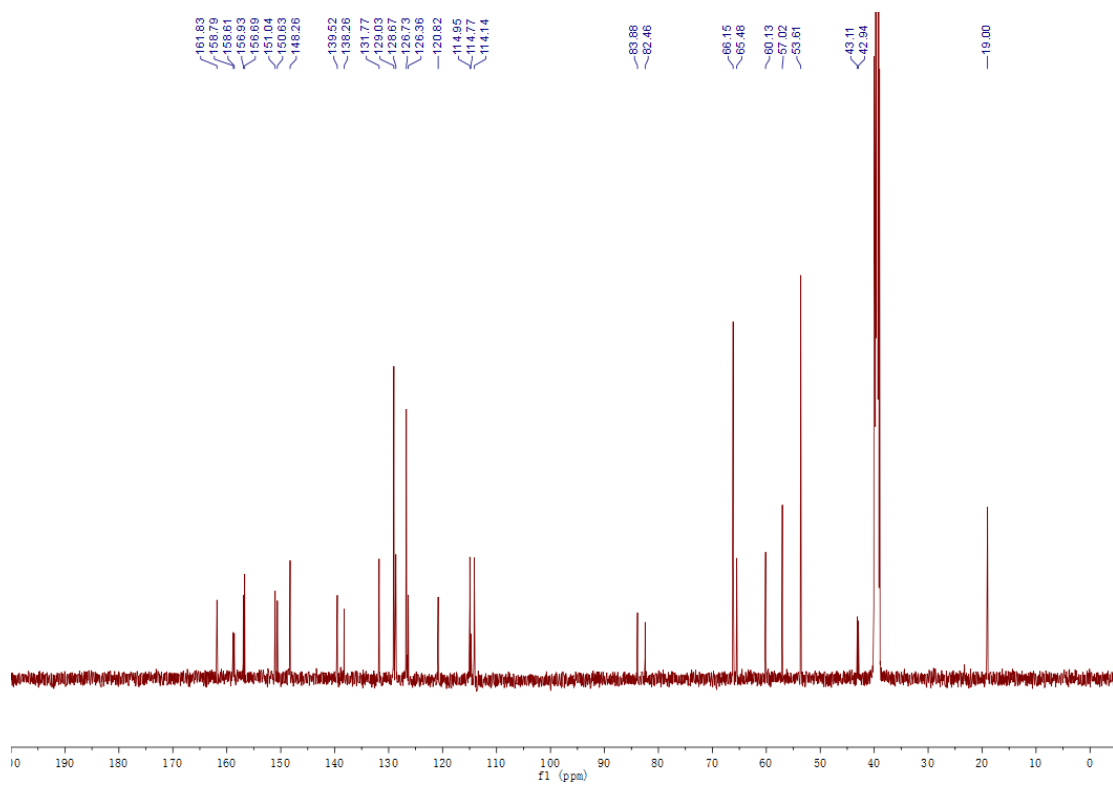

<sup>1</sup>H and <sup>13</sup>C NMR spectra of compound **26**

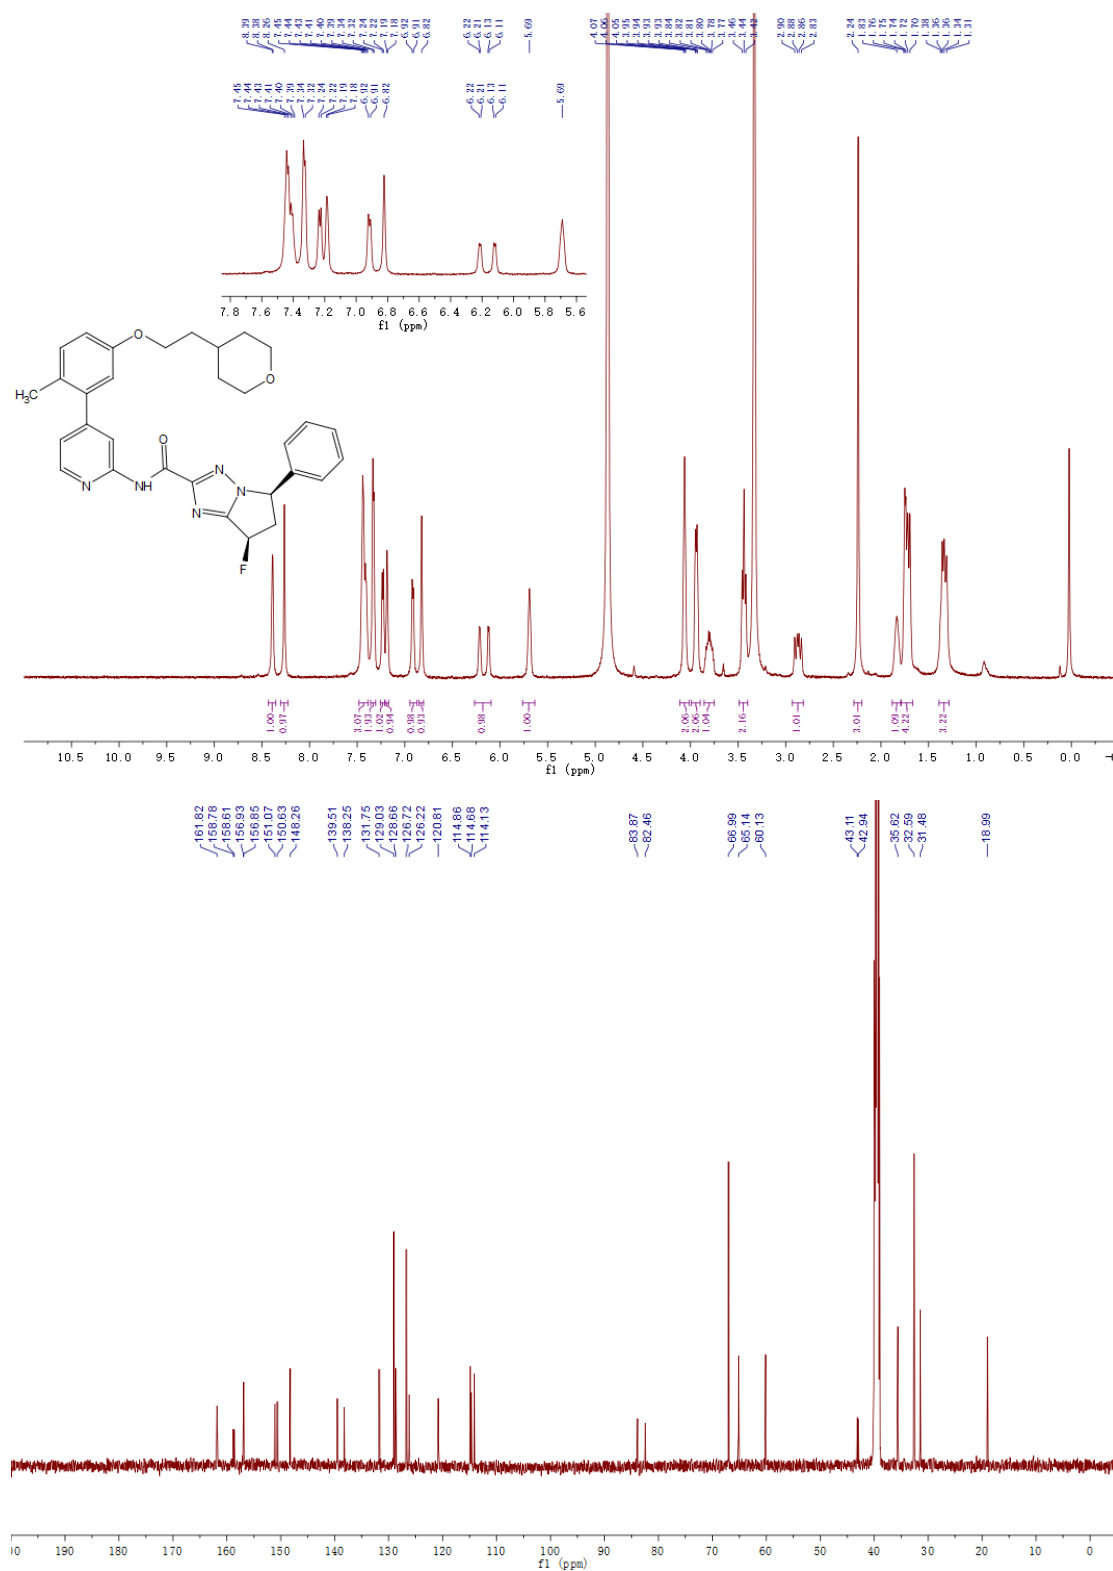

<sup>1</sup>H and <sup>13</sup>C NMR spectra of compound 27

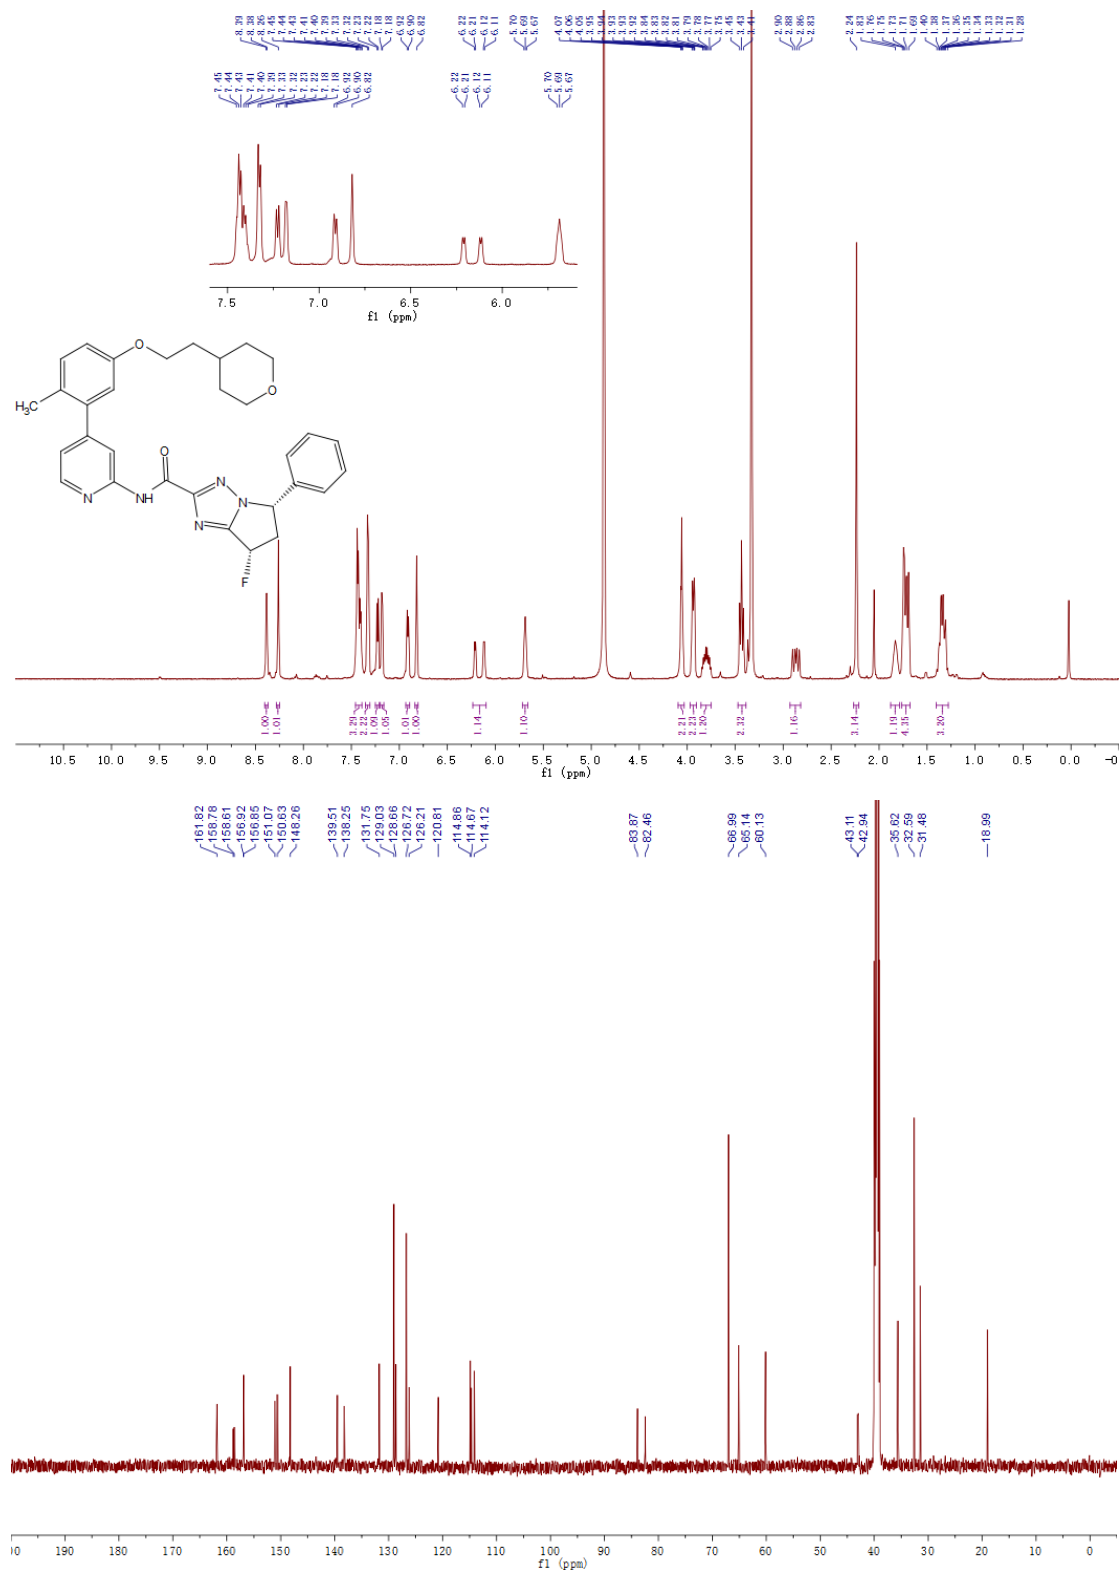

<sup>1</sup>H and <sup>13</sup>C NMR spectra of compound 28

### 3. HPLC traces of target compounds

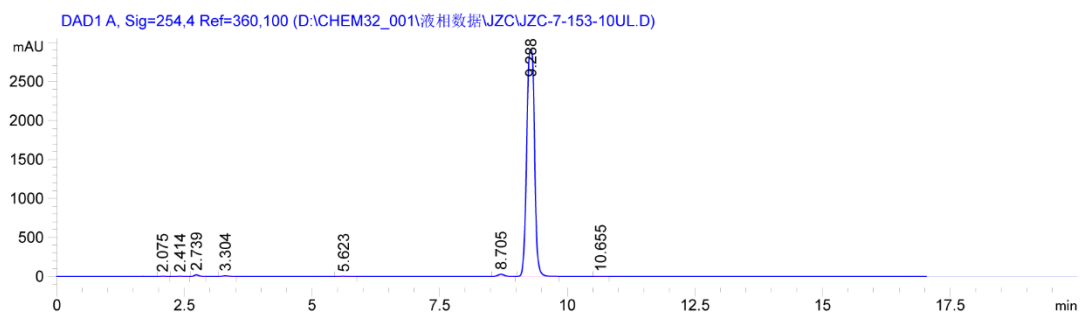

=====  
 Area Percent Report  
 =====

| Peak #   | RetTime [min] | Type | Width [min] | Area [mAU*s] | Height [mAU] | Area %  |
|----------|---------------|------|-------------|--------------|--------------|---------|
| 1        | 2.075         | BB   | 0.0971      | 11.93954     | 1.80738      | 0.0381  |
| 2        | 2.414         | BB   | 0.1286      | 16.61146     | 1.85195      | 0.0530  |
| 3        | 2.739         | BB   | 0.0969      | 121.85189    | 19.49831     | 0.3890  |
| 4        | 3.304         | BB   | 0.1098      | 57.02700     | 8.13296      | 0.1821  |
| 5        | 5.623         | BB   | 0.1361      | 9.47715      | 1.08323      | 0.0303  |
| 6        | 8.705         | BB   | 0.1360      | 244.83781    | 28.00639     | 0.7817  |
| 7        | 9.288         | BB   | 0.1677      | 3.08352e4    | 2908.52441   | 98.4470 |
| 8        | 10.655        | BV   | 0.1292      | 24.68201     | 2.96116      | 0.0788  |
| Totals : |               |      |             | 3.13216e4    | 2971.86579   |         |

### HPLC traces of compound 7

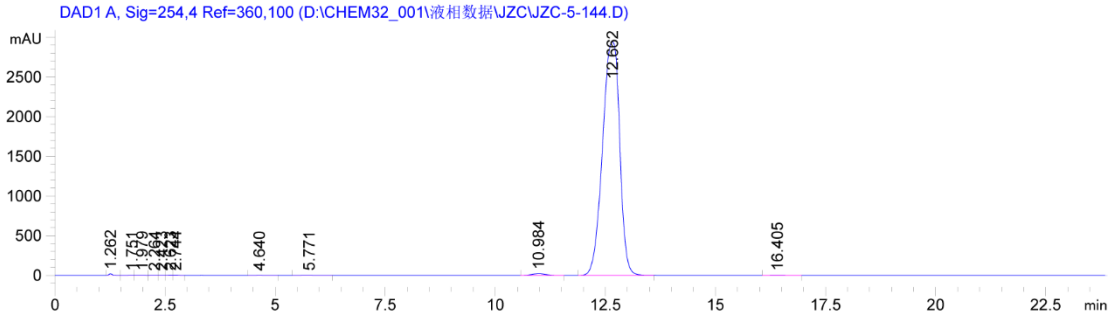

=====  
 Area Percent Report  
 =====

| Peak #   | RetTime [min] | Type | Width [min] | Area [mAU*s] | Height [mAU] | Area %  |
|----------|---------------|------|-------------|--------------|--------------|---------|
| 1        | 1.262         | BB   | 0.0821      | 103.06296    | 18.74362     | 0.1284  |
| 2        | 1.751         | BV   | 0.1492      | 18.20156     | 1.54720      | 0.0227  |
| 3        | 1.979         | VV   | 0.1537      | 33.94067     | 3.10127      | 0.0423  |
| 4        | 2.264         | VV   | 0.1661      | 21.55850     | 1.99378      | 0.0269  |
| 5        | 2.423         | VV   | 0.1110      | 19.84119     | 2.60167      | 0.0247  |
| 6        | 2.623         | VV   | 0.1061      | 33.90987     | 4.70468      | 0.0423  |
| 7        | 2.744         | VB   | 0.1064      | 36.30606     | 5.01591      | 0.0452  |
| 8        | 4.640         | VB   | 0.1389      | 12.10910     | 1.45797      | 0.0151  |
| 9        | 5.771         | BB   | 0.2877      | 37.17867     | 1.73694      | 0.0463  |
| 10       | 10.984        | BB   | 0.3361      | 442.76932    | 20.65068     | 0.5518  |
| 11       | 12.662        | BB   | 0.4231      | 7.94419e4    | 2941.80298   | 99.0105 |
| 12       | 16.405        | BB   | 0.3601      | 35.09076     | 1.47201      | 0.0437  |
| Totals : |               |      |             | 8.02359e4    | 3004.82872   |         |

HPLC traces of compound 8

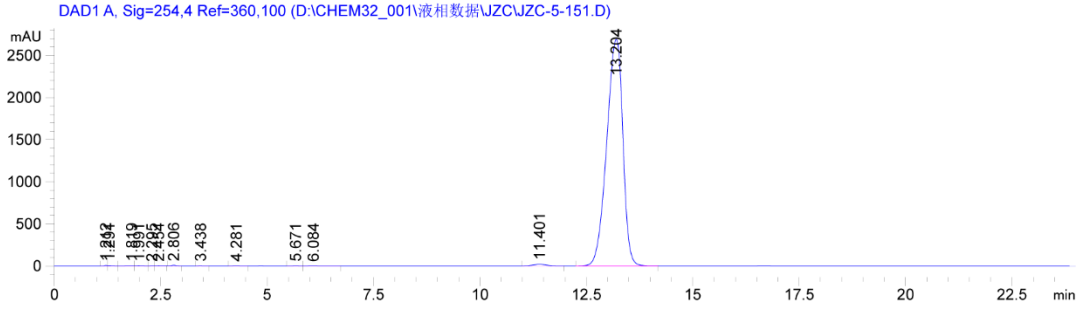

=====  
 Area Percent Report  
 =====

| Peak # | RetTime [min] | Type | Width [min] | Area [mAU*s] | Height [mAU] | Area %  |
|--------|---------------|------|-------------|--------------|--------------|---------|
| 1      | 1.212         | BV   | 0.0638      | 27.69750     | 6.49320      | 0.0386  |
| 2      | 1.291         | VB   | 0.0870      | 32.14153     | 5.13785      | 0.0448  |
| 3      | 1.819         | BV   | 0.1607      | 35.00338     | 2.82236      | 0.0488  |
| 4      | 1.991         | VV   | 0.1685      | 36.06695     | 3.08347      | 0.0503  |
| 5      | 2.295         | VV   | 0.1083      | 11.11665     | 1.50288      | 0.0155  |
| 6      | 2.454         | VB   | 0.1330      | 30.50799     | 3.20639      | 0.0425  |
| 7      | 2.806         | BB   | 0.1212      | 60.91443     | 7.46528      | 0.0850  |
| 8      | 3.438         | VB   | 0.1244      | 10.98609     | 1.35799      | 0.0153  |
| 9      | 4.281         | BB   | 0.1642      | 16.97644     | 1.59517      | 0.0237  |
| 10     | 5.671         | BV   | 0.1927      | 14.08924     | 1.09062      | 0.0197  |
| 11     | 6.084         | VB   | 0.2102      | 22.52876     | 1.68265      | 0.0314  |
| 12     | 11.401        | BB   | 0.3374      | 409.20563    | 18.84329     | 0.5707  |
| 13     | 13.204        | BB   | 0.4100      | 7.09931e4    | 2689.14307   | 99.0136 |

Totals : 7.17004e4 2743.42423

**HPLC traces of compound 9**

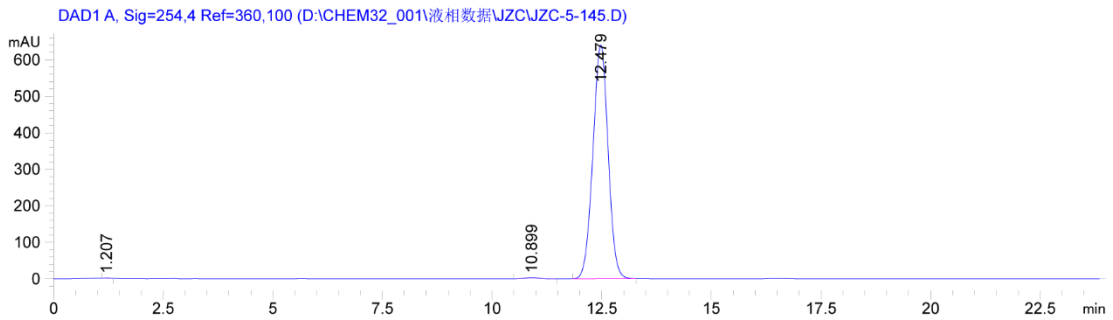

=====  
 Area Percent Report  
 =====

| Peak # | RetTime [min] | Type | Width [min] | Area [mAU*s] | Height [mAU] | Area %  |
|--------|---------------|------|-------------|--------------|--------------|---------|
| 1      | 1.207         | BB   | 0.1144      | 11.22627     | 1.41681      | 0.0723  |
| 2      | 10.899        | BB   | 0.3331      | 77.26126     | 3.64721      | 0.4973  |
| 3      | 12.479        | BB   | 0.3756      | 1.54484e4    | 640.09253    | 99.4305 |

Totals : 1.55369e4 645.15655

**HPLC traces of compound 10**

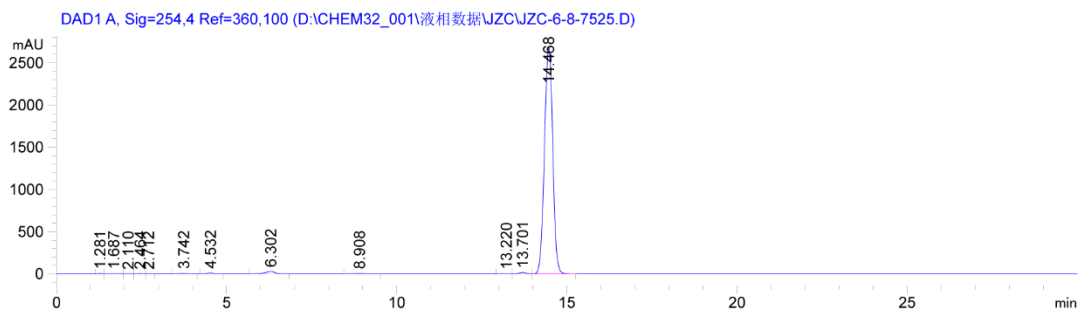

=====  
 Area Percent Report  
 =====

| Peak #   | RetTime [min] | Type | Width [min] | Area [mAU*s] | Height [mAU] | Area %  |
|----------|---------------|------|-------------|--------------|--------------|---------|
| 1        | 1.281         | BV   | 0.1027      | 40.22535     | 5.96332      | 0.0859  |
| 2        | 1.687         | VV   | 0.2481      | 60.45518     | 3.14783      | 0.1291  |
| 3        | 2.110         | VV   | 0.1676      | 23.74777     | 1.90264      | 0.0507  |
| 4        | 2.464         | VV   | 0.1450      | 43.38755     | 4.25412      | 0.0926  |
| 5        | 2.712         | VB   | 0.1230      | 8.51706      | 1.02467      | 0.0182  |
| 6        | 3.742         | VB   | 0.1889      | 98.93079     | 7.54765      | 0.2113  |
| 7        | 4.532         | BB   | 0.1884      | 147.13420    | 11.72375     | 0.3142  |
| 8        | 6.302         | BB   | 0.2970      | 586.78662    | 28.88973     | 1.2530  |
| 9        | 8.908         | BB   | 0.3535      | 118.41454    | 5.24384      | 0.2529  |
| 10       | 13.220        | BV   | 0.2272      | 28.65466     | 1.90778      | 0.0612  |
| 11       | 13.701        | VV   | 0.2358      | 249.15660    | 16.34879     | 0.5320  |
| 12       | 14.468        | VB   | 0.2658      | 4.54245e4    | 2678.79199   | 96.9989 |
| Totals : |               |      |             | 4.68299e4    | 2766.74611   |         |

HPLC traces of compound 11

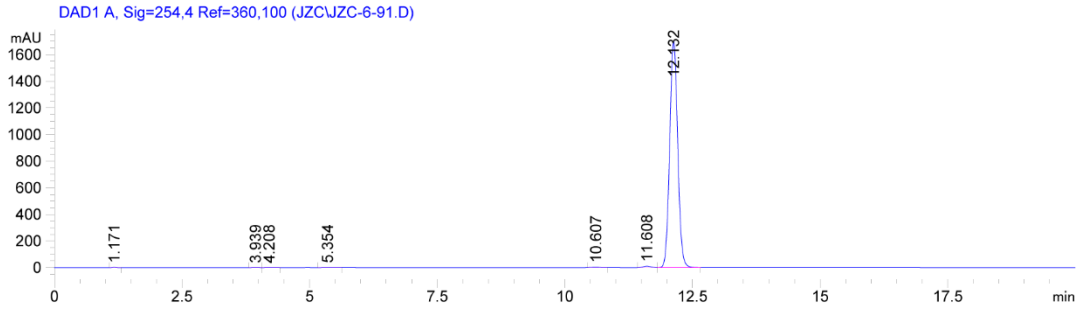

=====  
 Area Percent Report  
 =====

| Peak #   | RetTime [min] | Type | Width [min] | Area [mAU*s] | Height [mAU] | Area %  |
|----------|---------------|------|-------------|--------------|--------------|---------|
| 1        | 1.171         | BB   | 0.0725      | 8.35310      | 1.72393      | 0.0446  |
| 2        | 3.939         | BV   | 0.1172      | 7.64907      | 1.02310      | 0.0408  |
| 3        | 4.208         | VB   | 0.1377      | 10.98770     | 1.21263      | 0.0587  |
| 4        | 5.354         | BB   | 0.1571      | 14.71715     | 1.44223      | 0.0786  |
| 5        | 10.607        | BB   | 0.1394      | 33.54911     | 3.71434      | 0.1792  |
| 6        | 11.608        | BV   | 0.1490      | 106.92207    | 11.24146     | 0.5710  |
| 7        | 12.132        | VB   | 0.1711      | 1.85441e4    | 1702.25195   | 99.0272 |
| Totals : |               |      |             | 1.87263e4    | 1722.60965   |         |

**HPLC traces of compound 12**

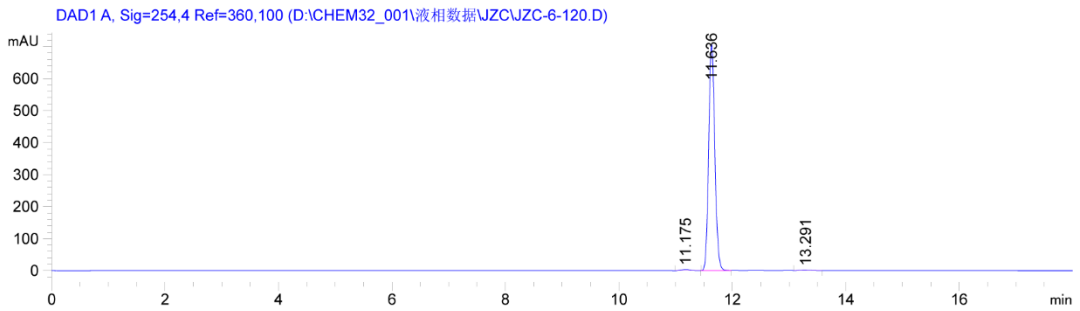

=====  
 Area Percent Report  
 =====

| Peak #   | RetTime [min] | Type | Width [min] | Area [mAU*s] | Height [mAU] | Area %  |
|----------|---------------|------|-------------|--------------|--------------|---------|
| 1        | 11.175        | BB   | 0.1481      | 40.07123     | 4.09747      | 0.7488  |
| 2        | 11.636        | BB   | 0.1152      | 5296.68311   | 708.83722    | 98.9803 |
| 3        | 13.291        | BB   | 0.1683      | 14.49667     | 1.36020      | 0.2709  |
| Totals : |               |      |             | 5351.25101   | 714.29490    |         |

**HPLC traces of compound 13**



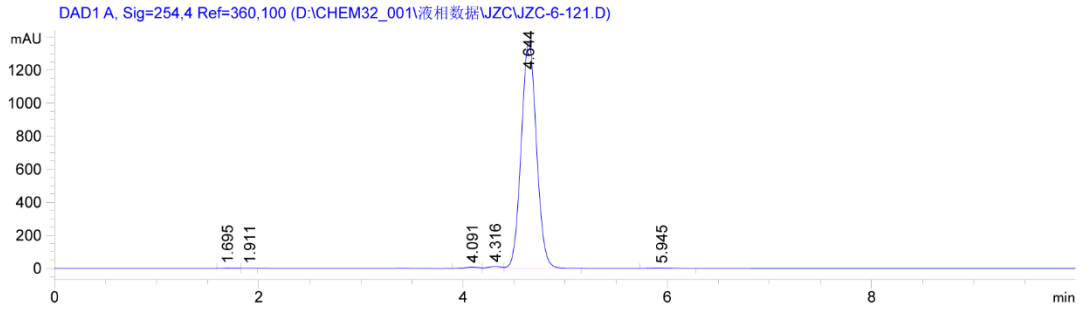

=====  
 Area Percent Report  
 =====

| Peak #   | RetTime [min] | Type | Width [min] | Area [mAU*s] | Height [mAU] | Area %  |
|----------|---------------|------|-------------|--------------|--------------|---------|
| 1        | 1.695         | VV   | 0.0933      | 15.18601     | 2.35252      | 0.1050  |
| 2        | 1.911         | VV   | 0.0835      | 7.58259      | 1.35032      | 0.0524  |
| 3        | 4.091         | BV   | 0.1425      | 62.90701     | 6.76158      | 0.4351  |
| 4        | 4.316         | VV   | 0.1355      | 95.64220     | 10.78057     | 0.6615  |
| 5        | 4.644         | VB   | 0.1610      | 1.42402e4    | 1373.31177   | 98.4878 |
| 6        | 5.945         | BB   | 0.1864      | 37.32717     | 3.19154      | 0.2582  |
| Totals : |               |      |             | 1.44588e4    | 1397.74831   |         |

**HPLC traces of compound 14**

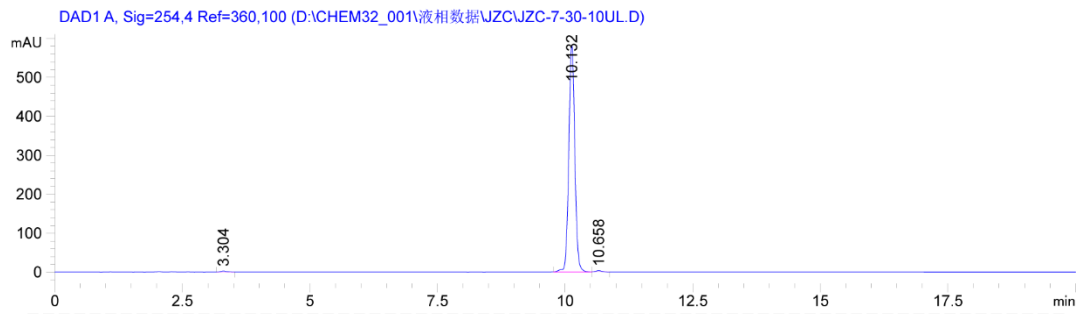

=====  
 Area Percent Report  
 =====

| Peak #   | RetTime [min] | Type | Width [min] | Area [mAU*s] | Height [mAU] | Area %  |
|----------|---------------|------|-------------|--------------|--------------|---------|
| 1        | 3.304         | BB   | 0.1260      | 25.30908     | 3.01205      | 0.5236  |
| 2        | 10.132        | BB   | 0.1278      | 4777.45605   | 581.68475    | 98.8334 |
| 3        | 10.658        | BB   | 0.1329      | 31.08210     | 3.59391      | 0.6430  |
| Totals : |               |      |             | 4833.84724   | 588.29071    |         |

**HPLC traces of compound 15**

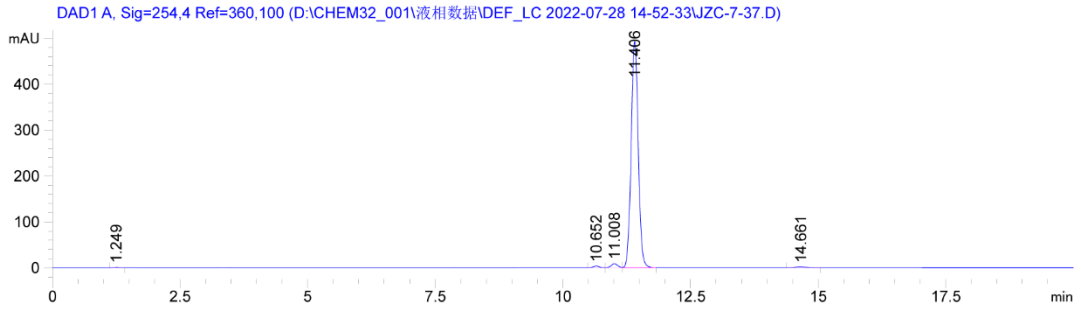

=====  
 Area Percent Report  
 =====

| Peak # | RetTime [min] | Type | Width [min] | Area [mAU*s] | Height [mAU] | Area %  |
|--------|---------------|------|-------------|--------------|--------------|---------|
| 1      | 1.249         | BB   | 0.0983      | 8.02234      | 1.22601      | 0.1648  |
| 2      | 10.652        | BV   | 0.1287      | 27.89470     | 3.36592      | 0.5729  |
| 3      | 11.008        | VV   | 0.1349      | 74.48811     | 8.60997      | 1.5297  |
| 4      | 11.406        | VB   | 0.1501      | 4733.05420   | 492.53671    | 97.2014 |
| 5      | 14.661        | BB   | 0.2275      | 25.86997     | 1.76008      | 0.5313  |

Totals : 4869.32932 507.49870

### HPLC traces of compound 16

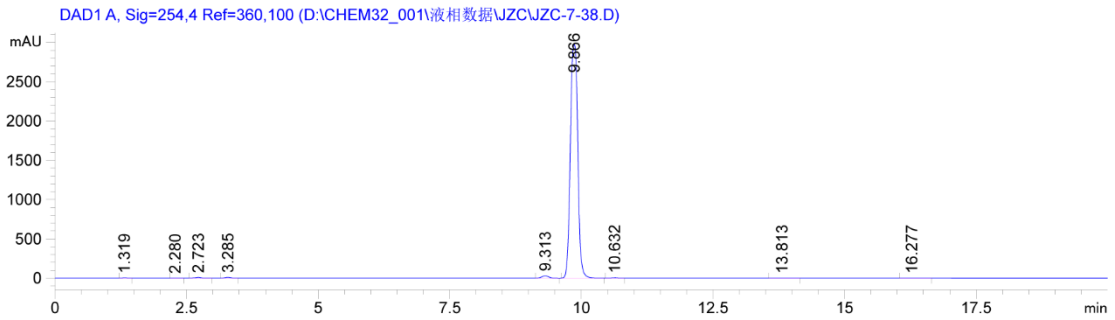

=====  
 Area Percent Report  
 =====

| Peak # | RetTime [min] | Type | Width [min] | Area [mAU*s] | Height [mAU] | Area %  |
|--------|---------------|------|-------------|--------------|--------------|---------|
| 1      | 1.319         | BB   | 0.0819      | 22.57444     | 4.11992      | 0.0763  |
| 2      | 2.280         | BB   | 0.0984      | 7.71739      | 1.11922      | 0.0261  |
| 3      | 2.723         | BB   | 0.1109      | 70.70839     | 9.28334      | 0.2390  |
| 4      | 3.285         | BB   | 0.1143      | 71.52702     | 9.67087      | 0.2418  |
| 5      | 9.313         | BB   | 0.1353      | 263.76694    | 30.38116     | 0.8915  |
| 6      | 9.866         | BB   | 0.1540      | 2.90677e4    | 2974.27246   | 98.2505 |
| 7      | 10.632        | BV   | 0.1468      | 43.22113     | 4.39314      | 0.1461  |
| 8      | 13.813        | BB   | 0.2060      | 20.71740     | 1.56978      | 0.0700  |
| 9      | 16.277        | BB   | 0.2256      | 17.36917     | 1.19503      | 0.0587  |

Totals : 2.95853e4 3036.00492

### HPLC traces of compound 17

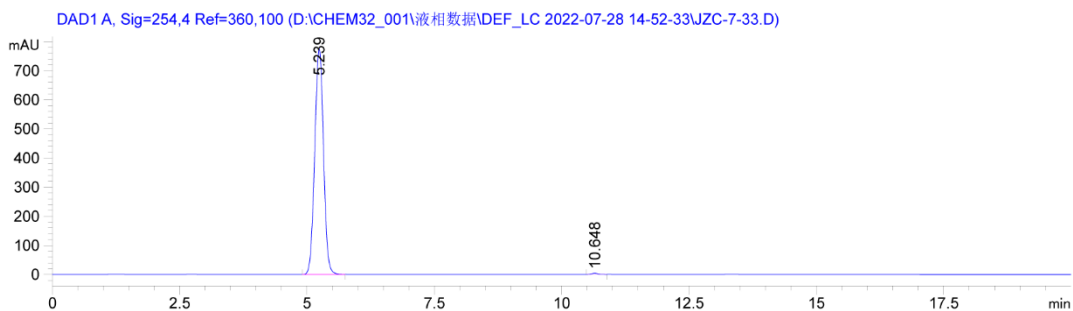

=====  
 Area Percent Report  
 =====

| Peak #   | RetTime [min] | Type | Width [min] | Area [mAU*s] | Height [mAU] | Area %  |
|----------|---------------|------|-------------|--------------|--------------|---------|
| 1        | 5.239         | BB   | 0.1874      | 9297.32227   | 777.84552    | 99.6135 |
| 2        | 10.648        | BB   | 0.1320      | 36.07273     | 4.29551      | 0.3865  |
| Totals : |               |      |             | 9333.39499   | 782.14103    |         |

**HPLC traces of compound 18**

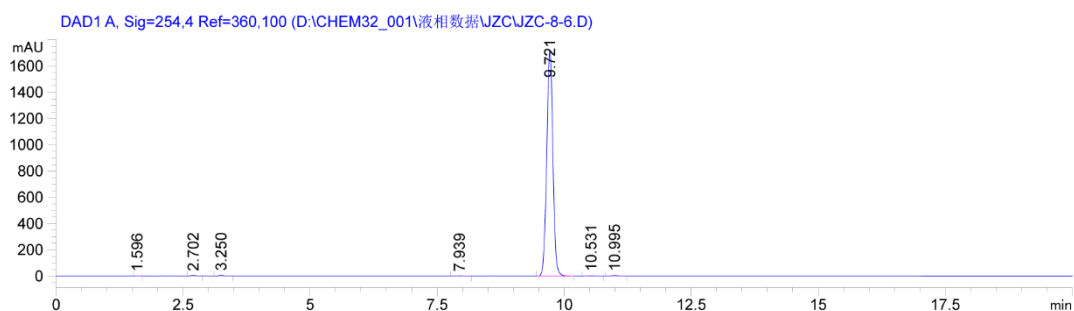

=====  
 Area Percent Report  
 =====

| Peak #   | RetTime [min] | Type | Width [min] | Area [mAU*s] | Height [mAU] | Area %  |
|----------|---------------|------|-------------|--------------|--------------|---------|
| 1        | 1.596         | VB   | 0.0740      | 6.96384      | 1.35303      | 0.0472  |
| 2        | 2.702         | BB   | 0.0967      | 42.46932     | 6.81788      | 0.2880  |
| 3        | 3.250         | BB   | 0.1102      | 50.10210     | 7.10818      | 0.3398  |
| 4        | 7.939         | BB   | 0.1442      | 23.80734     | 2.56635      | 0.1614  |
| 5        | 9.721         | BB   | 0.1326      | 1.45377e4    | 1720.73999   | 98.5871 |
| 6        | 10.531        | BB   | 0.1354      | 34.40367     | 3.87996      | 0.2333  |
| 7        | 10.995        | BB   | 0.1239      | 50.59940     | 6.28404      | 0.3431  |
| Totals : |               |      |             | 1.47461e4    | 1748.74945   |         |

**HPLC traces of compound 19**

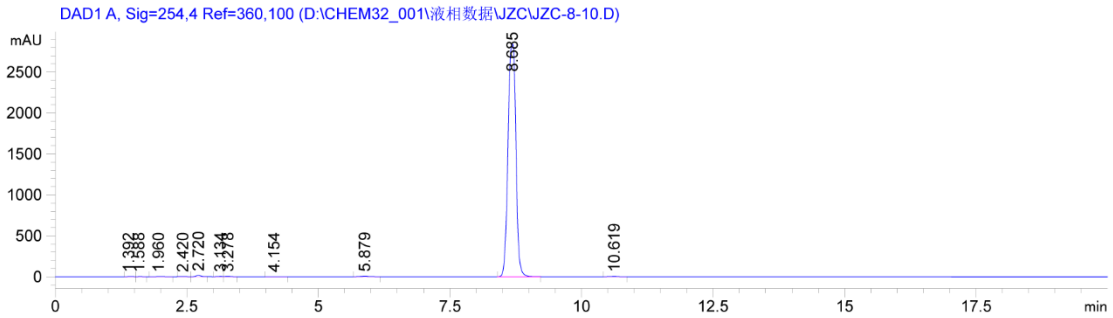

=====  
 Area Percent Report  
 =====

| Peak # | RetTime [min] | Type | Width [min] | Area [mAU*s] | Height [mAU] | Area %  |
|--------|---------------|------|-------------|--------------|--------------|---------|
| 1      | 1.392         | BV   | 0.1006      | 13.15375     | 1.81341      | 0.0439  |
| 2      | 1.588         | VB   | 0.0943      | 12.13883     | 1.85597      | 0.0405  |
| 3      | 1.960         | BB   | 0.1749      | 22.27843     | 1.65691      | 0.0744  |
| 4      | 2.420         | BV   | 0.1076      | 25.46692     | 3.46900      | 0.0850  |
| 5      | 2.720         | VB   | 0.1005      | 104.29250    | 15.91348     | 0.3481  |
| 6      | 3.134         | BV   | 0.1098      | 23.05971     | 3.13466      | 0.0770  |
| 7      | 3.278         | VB   | 0.1129      | 32.49250     | 4.36212      | 0.1085  |
| 8      | 4.154         | BB   | 0.1292      | 22.32992     | 2.73732      | 0.0745  |
| 9      | 5.879         | BB   | 0.1746      | 57.98090     | 5.17912      | 0.1935  |
| 10     | 8.685         | BB   | 0.1631      | 2.96030e4    | 2851.52466   | 98.8147 |
| 11     | 10.619        | BB   | 0.1396      | 41.91390     | 4.63093      | 0.1399  |

Totals : 2.99581e4 2896.27758

HPLC traces of compound 20

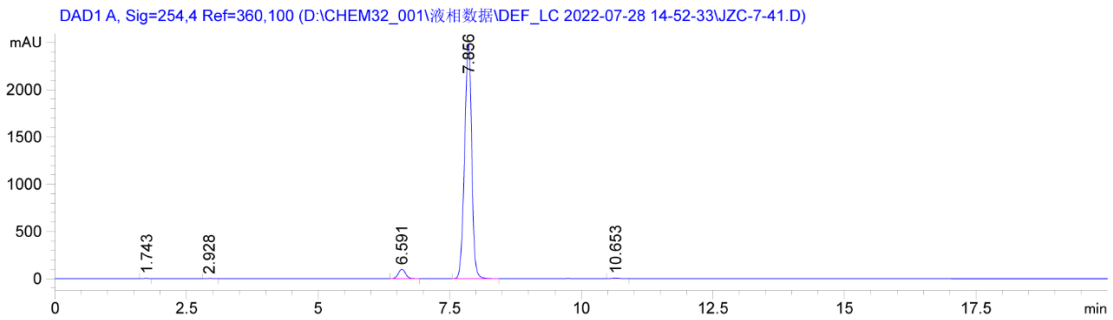

=====  
 Area Percent Report  
 =====

| Peak # | RetTime [min] | Type | Width [min] | Area [mAU*s] | Height [mAU] | Area %  |
|--------|---------------|------|-------------|--------------|--------------|---------|
| 1      | 1.743         | BV   | 0.0754      | 17.39198     | 3.41546      | 0.0711  |
| 2      | 2.928         | BB   | 0.1014      | 11.87218     | 1.83804      | 0.0485  |
| 3      | 6.591         | BB   | 0.1470      | 956.09943    | 100.50344    | 3.9088  |
| 4      | 7.856         | BB   | 0.1485      | 2.34343e4    | 2473.18701   | 95.8047 |
| 5      | 10.653        | BB   | 0.1342      | 40.81966     | 4.75493      | 0.1669  |

Totals : 2.44604e4 2583.69889

HPLC traces of compound 21

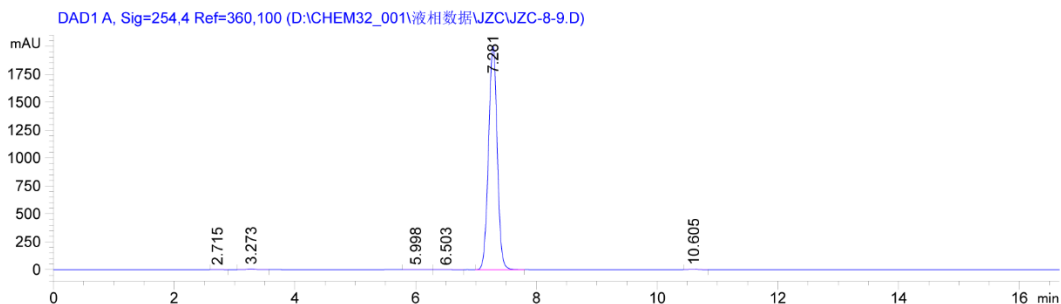

=====  
 Area Percent Report  
 =====

| Peak # | RetTime [min] | Type | Width [min] | Area [mAU*s] | Height [mAU] | Area %  |
|--------|---------------|------|-------------|--------------|--------------|---------|
| 1      | 2.715         | BB   | 0.1030      | 9.60400      | 1.41908      | 0.0474  |
| 2      | 3.273         | BB   | 0.1336      | 64.47256     | 6.98773      | 0.3181  |
| 3      | 5.998         | BB   | 0.1664      | 16.83026     | 1.57799      | 0.0830  |
| 4      | 6.503         | BB   | 0.1615      | 13.98218     | 1.38864      | 0.0690  |
| 5      | 7.281         | BB   | 0.1574      | 2.01275e4    | 1999.96863   | 99.2978 |
| 6      | 10.605        | BB   | 0.1338      | 37.44089     | 4.37849      | 0.1847  |

Totals : 2.02699e4 2015.72056

**HPLC traces of compound 22**

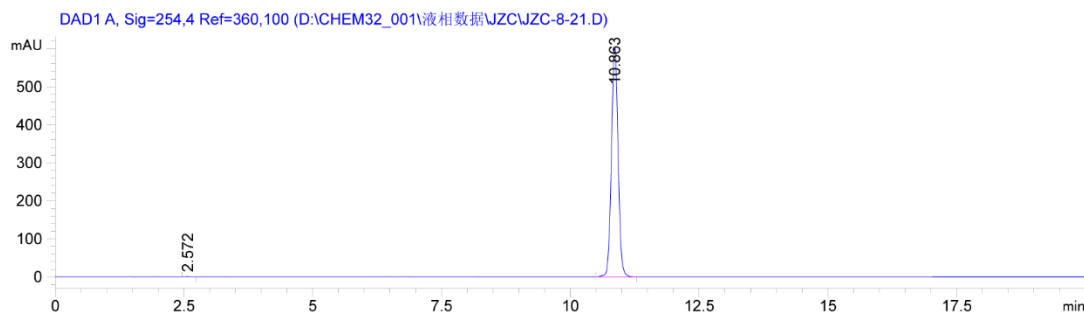

=====  
 Area Percent Report  
 =====

| Peak # | RetTime [min] | Type | Width [min] | Area [mAU*s] | Height [mAU] | Area %  |
|--------|---------------|------|-------------|--------------|--------------|---------|
| 1      | 2.572         | BB   | 0.0855      | 5.75117      | 1.05718      | 0.1054  |
| 2      | 10.863        | BB   | 0.1396      | 5448.19678   | 602.09296    | 99.8946 |

Totals : 5453.94794 603.15014

**HPLC traces of compound 23**

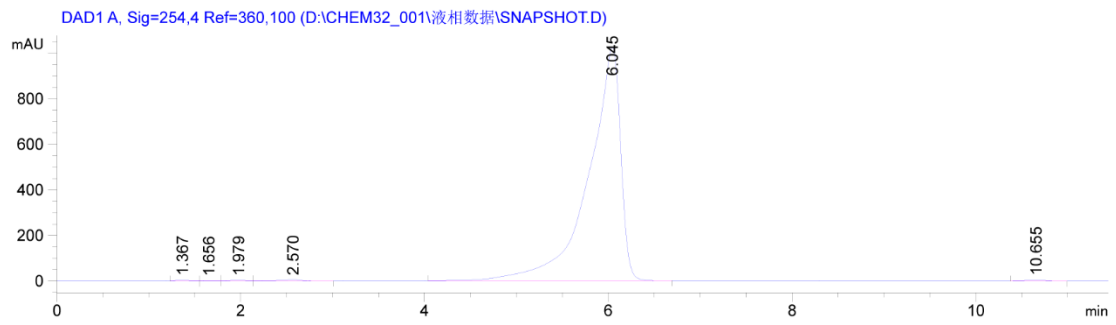

=====  
 Area Percent Report  
 =====

| Peak # | RetTime [min] | Type | Width [min] | Area [mAU*s] | Height [mAU] | Area %  |
|--------|---------------|------|-------------|--------------|--------------|---------|
| 1      | 1.367         | BV   | 0.1240      | 38.35120     | 4.14352      | 0.1528  |
| 2      | 1.656         | VV   | 0.1103      | 15.57590     | 1.92658      | 0.0620  |
| 3      | 1.979         | VV   | 0.1600      | 41.29227     | 3.64921      | 0.1645  |
| 4      | 2.570         | VB   | 0.2221      | 86.95460     | 5.69633      | 0.3464  |
| 5      | 6.045         | BB   | 0.3288      | 2.48560e4    | 1025.34070   | 99.0051 |
| 6      | 10.655        | BB   | 0.1982      | 67.59714     | 5.25073      | 0.2692  |

Totals :                                2.51058e4    1046.00708

**HPLC traces of compound 24**

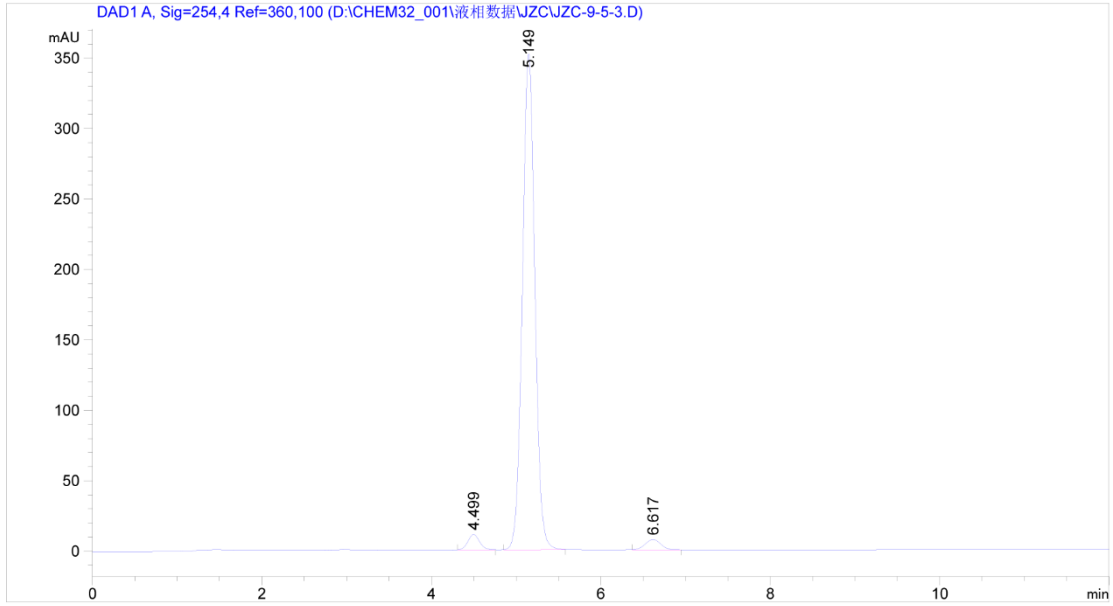

=====  
 Area Percent Report  
 =====

| Peak #   | RetTime [min] | Type | Width [min] | Area [mAU*s] | Height [mAU] | Area %  |
|----------|---------------|------|-------------|--------------|--------------|---------|
| 1        | 4.499         | BB   | 0.1477      | 105.05843    | 10.97565     | 2.6329  |
| 2        | 5.149         | BB   | 0.1590      | 3792.07349   | 352.27576    | 95.0334 |
| 3        | 6.617         | BB   | 0.1946      | 93.12179     | 7.40838      | 2.3334  |
| Totals : |               |      |             | 3990.25371   | 370.65978    |         |

HPLC traces of compound **25**

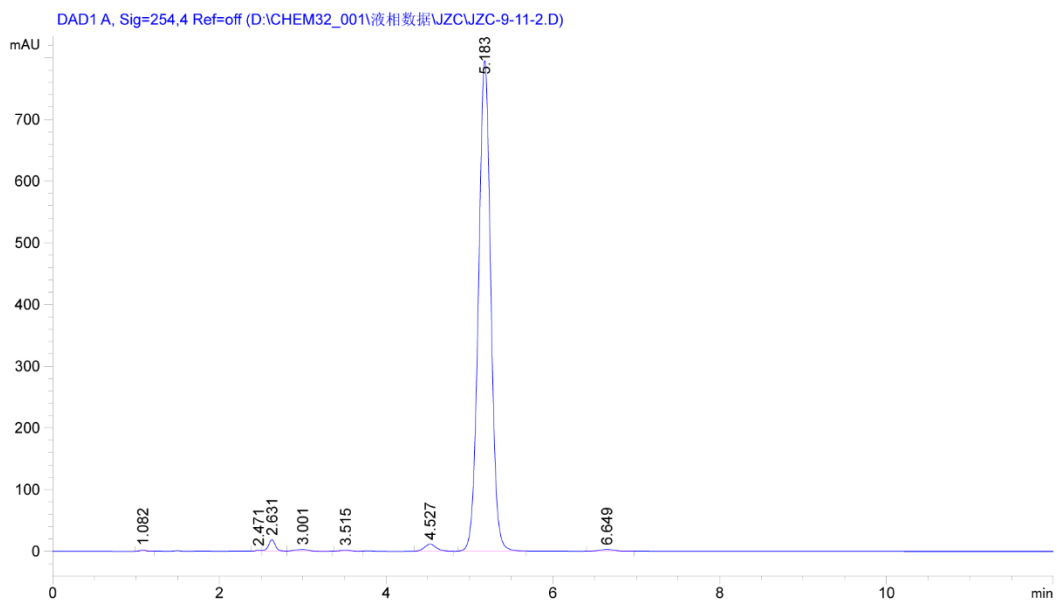

=====  
 Area Percent Report  
 =====

| Peak #   | RetTime [min] | Type | Width [min] | Area [mAU*s] | Height [mAU] | Area %  |
|----------|---------------|------|-------------|--------------|--------------|---------|
| 1        | 1.082         | BB   | 0.0720      | 10.67585     | 2.22602      | 0.1263  |
| 2        | 2.471         | BV   | 0.0687      | 6.45290      | 1.42771      | 0.0763  |
| 3        | 2.631         | VV   | 0.0863      | 105.85324    | 18.62184     | 1.2521  |
| 4        | 3.001         | VB   | 0.1744      | 29.05828     | 2.76954      | 0.3437  |
| 5        | 3.515         | BB   | 0.1127      | 11.28000     | 1.59050      | 0.1334  |
| 6        | 4.527         | BB   | 0.1522      | 114.91138    | 11.53612     | 1.3592  |
| 7        | 5.183         | BB   | 0.1594      | 8140.64209   | 795.58441    | 96.2892 |
| 8        | 6.649         | BB   | 0.1924      | 35.49388     | 2.86717      | 0.4198  |
| Totals : |               |      |             | 8454.36761   | 836.62331    |         |

HPLC traces of compound 26



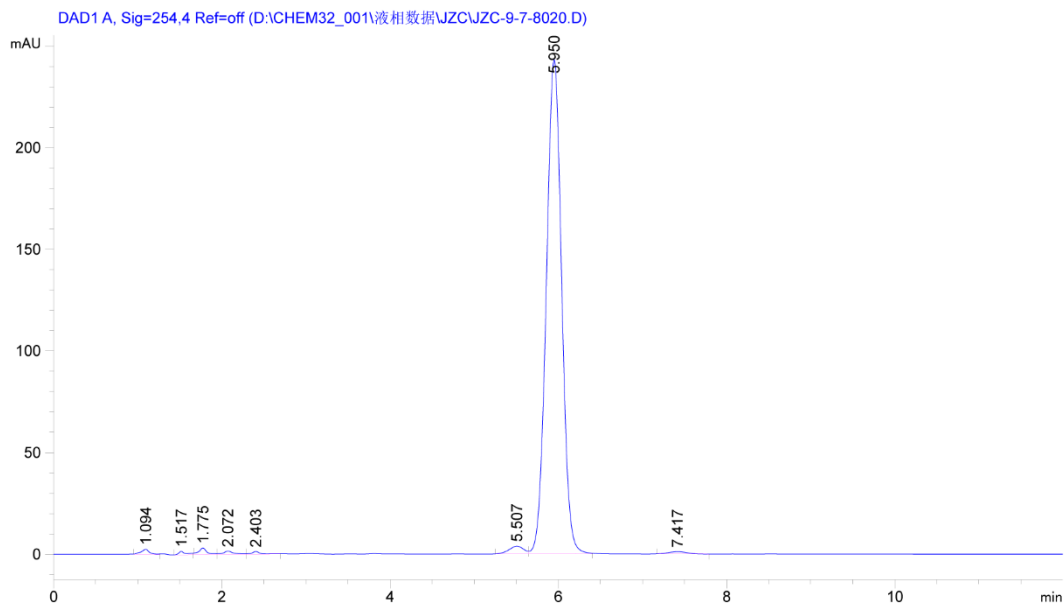

=====  
 Area Percent Report  
 =====

| Peak #   | RetTime [min] | Type | Width [min] | Area [mAU*s] | Height [mAU] | Area %  |
|----------|---------------|------|-------------|--------------|--------------|---------|
| 1        | 1.094         | BB   | 0.1025      | 17.32398     | 2.44844      | 0.5395  |
| 2        | 1.517         | BB   | 0.0832      | 10.04524     | 1.64512      | 0.3129  |
| 3        | 1.775         | BV   | 0.0948      | 21.87177     | 3.23830      | 0.6812  |
| 4        | 2.072         | VV   | 0.1266      | 14.32246     | 1.59787      | 0.4461  |
| 5        | 2.403         | VB   | 0.1043      | 9.45238      | 1.30819      | 0.2944  |
| 6        | 5.507         | BV   | 0.1870      | 46.64705     | 3.80665      | 1.4528  |
| 7        | 5.950         | VB   | 0.1975      | 3074.48218   | 243.20869    | 95.7524 |
| 8        | 7.417         | BB   | 0.2356      | 16.72172     | 1.08649      | 0.5208  |
| Totals : |               |      |             | 3210.86678   | 258.33974    |         |

HPLC traces of compound 27

DAD1 A, Sig=254,4 Ref=off (D:\CHEM32\_001\液相数据\JZCUZC-9-10.D)

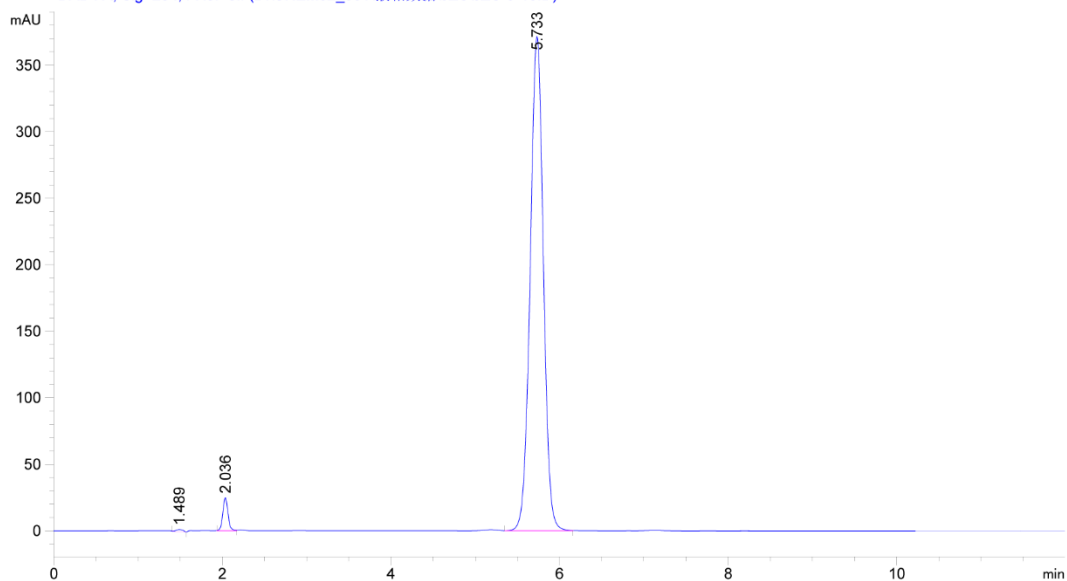

=====  
Area Percent Report  
=====

| Peak #   | RetTime [min] | Type | Width [min] | Area [mAU*s] | Height [mAU] | Area %  |
|----------|---------------|------|-------------|--------------|--------------|---------|
| 1        | 1.489         | BV   | 0.0926      | 8.39113      | 1.51505      | 0.2023  |
| 2        | 2.036         | BV   | 0.0660      | 106.39360    | 24.83202     | 2.5644  |
| 3        | 5.733         | VB   | 0.1686      | 4034.02075   | 371.62286    | 97.2333 |
| Totals : |               |      |             | 4148.80549   | 397.96993    |         |

HPLC traces of compound **28**

#### 4. HRMS of compound **26**

##### User Spectra

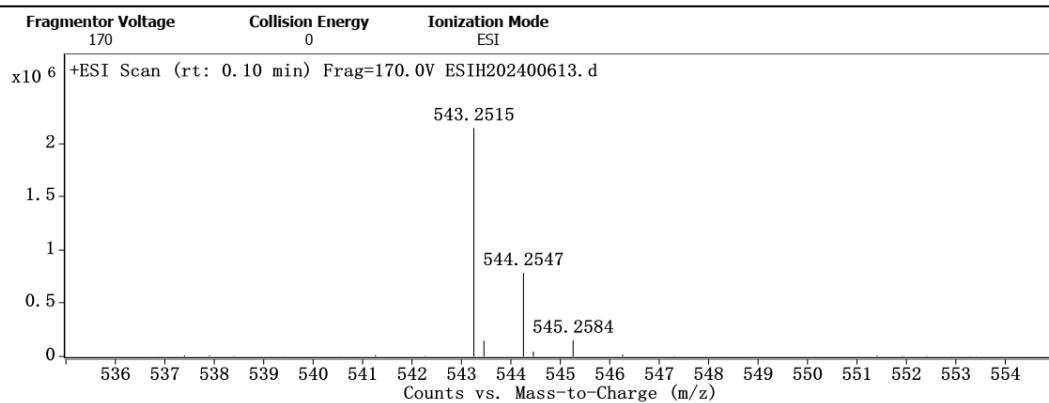

Supplement: d4md00265b1.pdf [file d4md00265b1.pdf]
